1 **Title: Comparison of Rhesus and Cynomolgus macaques as an authentic**  
2 **model for COVID-19.**

3

4 **Authors:** Francisco J. Salguero<sup>1</sup>, Andrew D. White<sup>1</sup>, Gillian S. Slack<sup>1</sup>, Susan A.  
5 Fotheringham<sup>1</sup>, Kevin R. Bewley<sup>1</sup>, Karen E. Gooch<sup>1</sup>, Stephanie Longet<sup>1</sup>, Holly E.  
6 Humphries<sup>1</sup>, Robert J. Watson<sup>1</sup>, Laura Hunter<sup>1</sup>, Kathryn A. Ryan<sup>1</sup>, Yper Hall<sup>1</sup>, Laura  
7 Sibley<sup>1</sup>, Charlotte Sarfas<sup>1</sup>, Lauren Allen<sup>1</sup>, Marilyn Aram<sup>1</sup>, Emily Brunt<sup>1</sup>, Phillip  
8 Brown<sup>1</sup>, Karen R. Buttigieg<sup>1</sup>, Breeze E. Cavell<sup>1</sup>, Rebecca Cobb<sup>1</sup>, Naomi S.  
9 Coombes<sup>1</sup>, Owen Daykin-Pont<sup>1</sup>, Michael J. Elmore<sup>1</sup>, Konstantinos Gkolfinos<sup>1</sup>, Kerry  
10 J. Godwin<sup>1</sup>, Jade Gouriet<sup>1</sup>, Rachel Halkerston<sup>1</sup>, Debbie J. Harris<sup>1</sup>, Thomas Hender<sup>1</sup>,  
11 Catherine M.K. Ho<sup>1</sup>, Chelsea L. Kennard<sup>1</sup>, Daniel Knott<sup>1</sup>, Stephanie Leung<sup>1</sup>,  
12 Vanessa Lucas<sup>1</sup>, Adam Mabbutt<sup>1</sup>, Alexandra L. Morrison<sup>1</sup>, Didier Ngabo<sup>1</sup>, Jemma  
13 Paterson<sup>1</sup>, Elizabeth J. Penn<sup>1</sup>, Steve Pullan<sup>1</sup>, Irene Taylor<sup>1</sup>, Tom Tipton<sup>1</sup>, Stephen  
14 Thomas<sup>1</sup>, Julia A. Tree<sup>1</sup>, Carrie Turner<sup>1</sup>, Nadina Wand<sup>1</sup>, Nathan R. Wiblin<sup>1</sup>, Sue  
15 Charlton<sup>1</sup>, Bassam Hallis<sup>1</sup>, Geoffrey Pearson<sup>1</sup>, Emma L. Rayner<sup>1</sup>, Andrew G.  
16 Nicholson<sup>2</sup>, Simon G. Funnell<sup>1</sup>, Mike J. Dennis<sup>1</sup>, Fergus V. Gleeson<sup>3</sup>, Sally Sharpe<sup>1</sup>,  
17 Miles W. Carroll<sup>1,\*</sup>.

18 **Affiliations:**

19 <sup>1</sup>National Infection Service, Public Health England (PHE), Porton Down, Salisbury,  
20 Wiltshire, United Kingdom. SP4 0JG.

21 <sup>2</sup>Royal Brompton and Harefield NHS Foundation Trust, and National Heart and Lung  
22 Institute, Imperial College, London

23 <sup>3</sup>Department of Oncology, Oxford University, Oxford, UK.

24

25

26 **\*Corresponding author**

27 Professor Miles Carroll. National Infection Service. Public Health England. Porton  
28 Down, Salisbury, Wiltshire, SP4 0GJ. Email: [miles.carroll@phe.gov.uk](mailto:miles.carroll@phe.gov.uk). Telephone:  
29 01980 612100

30

31 **Short title:** COVID-19 infection in Rhesus and Cynomolgus macaques

32

33 **ABSTRACT**

34 A novel coronavirus, SARS-CoV-2, has been identified as the causative agent of the  
35 current COVID-19 pandemic. Animal models, and in particular non-human primates,  
36 are essential to understand the pathogenesis of emerging diseases and to the safety  
37 and efficacy of novel vaccines and therapeutics. Here, we show that SARS-CoV-2  
38 replicates in the upper and lower respiratory tract and causes pulmonary lesions in  
39 both rhesus and cynomolgus macaques, resembling the mild clinical cases of  
40 COVID-19 in humans. Immune responses against SARS-CoV-2 were also similar in  
41 both species and equivalent to those reported in milder infections and convalescent  
42 human patients. Importantly, we have devised a new method for lung histopathology  
43 scoring that will provide a metric to enable clearer decision making for this key  
44 endpoint. In contrast to prior publications, in which rhesus are accepted to be the  
45 optimal study species, we provide convincing evidence that both macaque species  
46 authentically represent mild to moderate forms of COVID-19 observed in the majority  
47 of the human population and both species should be used to evaluate the safety and  
48 efficacy of novel and repurposed interventions against SARS-CoV-2. Accessing  
49 cynomolgus macaques will greatly alleviate the pressures on current rhesus stocks.

50 **INTRODUCTION**

51 A novel acute respiratory syndrome, now called Coronavirus disease-19 (COVID-19)  
52 was first reported in Wuhan, China in December 2019. The genetic sequence of the  
53 causative agent was found to have similarity with two highly pathogenic respiratory  
54 beta Coronaviruses, SARS <sup>1</sup> and MERS <sup>2</sup>, and was later called SARS-CoV-2 <sup>3</sup>. It has  
55 currently infected >21 million individuals resulting in >750,000 deaths <sup>4</sup>. Among the  
56 clinical and pathological signs of SARS-CoV-2 infection in humans, pneumonia  
57 accompanied by respiratory distress seem to be the most clinically relevant <sup>5,6</sup>.

58

59 The development of animal models that replicate human disease is a crucial step in  
60 the study of pathogenesis and transmission, in addition to the assessment of the  
61 safety and efficacy of candidate vaccines and therapeutics. Due to their obvious  
62 physiological similarities to humans, non-human primates (NHPs), such as  
63 macaques, have long been recognised as the most clinically relevant animal for  
64 development of *in vivo* models of human disease. Prior NHP models developed for  
65 SARS and MERS have shown respiratory induced pathology with similar features as  
66 those seen in humans, including diffuse alveolar damage. For SARS, though rhesus  
67 macaques became the preferred species, the literature suggests there is no  
68 significant difference in susceptibility of cynomolgus (*Macaca fascicularis*) or rhesus  
69 macaques (*Macaca mulatta*) to infection, virus replication and pathology <sup>7-10</sup>. Recent  
70 studies have shown that rhesus macaques <sup>11,12</sup> and cynomolgus macaques <sup>13</sup> can be  
71 infected by SARS-CoV-2 and the disease course resembles some features of human  
72 COVID-19 infection. Rhesus macaques appear to display more extensive lung  
73 pathology and clinical signs, however a direct comparison of species, based on  
74 these studies, is not possible because different strains of virus, dose and route of

75 administration have been used. There is an accepted preference to use rhesus  
76 macaques for the assessment of COVID-19 vaccine and therapeutics, based on the  
77 limited number of studies that have been performed. A head-to-head comparison of  
78 rhesus versus cynomolgus macaques, under the same experimental conditions, is  
79 urgently required as there are now acute pressures on rhesus stocks that will impact  
80 on the ability to perform safety and efficacy studies on new vaccines and  
81 therapeutics.

82

83 This unique study aims to evaluate the outcome of exposure to SARS-CoV-2 in a  
84 head to head comparison of two macaque species: rhesus macaque (Indian  
85 genotype) and cynomolgus macaque (Mauritian genotype) exposed to the same well  
86 characterized strain of challenge virus. The resulting disease course in each species  
87 was closely compared for the first time.

88

89 Similar to recent NHP studies, a dose of  $5 \times 10^6$  pfu of SARS-CoV-2/Victoria/01/2020  
90 <sup>14</sup>, was delivered via the intranasal (IN) and intratracheal (IT) route to groups of each  
91 species comprising six animals. Sequential body fluid sampling and culls (at days  
92 4/5, 14/15 and 18/19) were performed to support a comprehensive comparative  
93 assessment of clinical signs, pathology, virology and immunology.

94

95

96 **RESULTS**

97 **Clinical signs and in-life imaging by CT scan**

98 Six rhesus macaques of Indian genotype and six cynomolgus macaques of Mauritian  
99 genotype were obtained from established UK Government breeding colonies. Study  
100 groups comprised three males and three females of each species and all were adults  
101 aged two to four years with body weights ranging between 2.89 - 4.85kg at time of  
102 challenge. Animals were challenged with a total of  $5 \times 10^6$  pfu of SARS-CoV-  
103 2/Victoria/01/2020 administered in volumes of 2 ml by the intratracheal route (using a  
104 bronchoscope for accurate placement right above the carinal bifurcation) and 1 ml by  
105 the intranasal route (0.5 ml in each nostril). Whole genome sequencing of the viral  
106 challenge stock, used in this study (Passage 3), confirmed there were no significant  
107 changes following passage in Vero/hSLAM cells, compared to the original isolate  
108 (Passage 1).

109

110 No significant weight loss or changes in body temperature were observed throughout  
111 the experiment. Adverse clinical signs were not recorded for any animal despite  
112 frequent monitoring during the study period.

113

114 Images from CT scans collected 18 days after challenge from two rhesus and two  
115 cynomolgus macaques, were examined by an expert thoracic radiologist with  
116 experience of non-human primate prior CT interpretation and human COVID-19 CT  
117 features, blinded to the clinical status. Pulmonary abnormalities that involved less  
118 than 25% of the lung and reflected those characteristic of SARS-CoV-2 infection in  
119 humans, were identified in one rhesus macaque and both cynomolgus macaques  
120 (Figure 1). Ground glass opacity was observed in all three macaques showing

121 abnormal lung structure, with peripheral consolidation also seen in one cynomolgus  
122 macaque. Abnormalities occurred in the peripheral two thirds of the middle and lower  
123 lung lobes in the two cynomolgus macaques and in a random pattern in the upper,  
124 middle and lower lobes of the rhesus macaque. Pulmonary emboli were not  
125 identified in any of the subjects.

126

### 127 **Viral load in clinical samples**

128 Viral load in the upper respiratory tract (URT) (nasal washes and throat swabs),  
129 gastrointestinal tract (rectal swabs) and in systemic samples (EDTA blood) was  
130 assessed by RT-qPCR at regular intervals throughout the study, and in  
131 bronchioalveolar lavage (BAL) collected at necropsy (Figure 2). High levels of viral  
132 RNA ( $>10^6$  cDNA copies/ml) were detected in nasal wash samples collected from  
133 both species one day post challenge (dpc). In rhesus macaques, viral RNA in nasal  
134 washes peaked at two dpc at  $6.9 \pm 2.3 \times 10^7$  cDNA copies/ml and levels remained  
135 between  $2.9 \times 10^5$  and  $4.8 \times 10^7$  cDNA copies/ml until eleven dpc, before decreasing  
136 to  $\leq 1.8 \times 10^4$  cDNA copies/ml by 18 dpc. Cynomolgus macaques displayed a similar  
137 pattern of viral RNA burden in nasal wash samples with peak levels detected at three  
138 dpc. However, levels later in infection remained higher with titres of  $2.0 \times 10^6$  cDNA  
139 copies/ml at 15 dpc and  $1.6 \times 10^5$  cDNA copies/ml at 19 dpc (Figure 2A).

140

141 Viral load in throat swabs largely mirrored that in nasal washes with peak levels early  
142 in infection, although, overall titres were lower. This was most notable at two dpc  
143 (Figure 2B). In rhesus macaques, viral RNA was detected above the lower limit of  
144 quantification (LLOQ -  $2.66 \times 10^3$  copies/ml) in all but one animal between one and  
145 three dpc and remained  $\geq 1.5 \times 10^4$  copies/ml for all animals between four and nine

146 dpc before falling and remaining below the assay's lower limit of detection (LLOD)  
147 from eleven dpc to 18 dpc. Throat swabs from cynomolgus macaques contained  
148 higher levels of viral RNA early in infection (one to three dpc) and remained  $\geq 4.5 \times$   
149  $10^4$  copies/ml for all animals between four and nine dpc.

150

151 Viral load in BAL samples echoed URT samples, with high ( $\geq 9.8 \times 10^6$  copies/ml)  
152 levels in both species at four and five dpc, dropping to  $\leq 2.4 \times 10^4$  copies/ml and  $\leq 1.9$   
153  $\times 10^4$  copies/ml at 14 dpc and 15 dpc in rhesus and cynomolgus macaques,  
154 respectively (Fig. 2C).

155

156 Virus shedding from the gastrointestinal tract was assessed by RT-qPCR performed  
157 on rectal swab samples. In rhesus macaques, low levels of viral RNA were detected  
158 from one dpc to nine dpc. In cynomolgus macaques, viral RNA was similarly  
159 detected at a low level in rectal swabs from one dpc to nine dpc. However viral RNA  
160 levels above the LLOQ were detected at both three dpc and five dpc in cynomolgus  
161 macaques in comparison to two dpc and three dpc in rhesus macaques (Figure 2D).

162 Viral RNA was detected at only two timepoints after challenge in whole blood  
163 samples and remained below the LLOQ throughout the study (Figure 2E). In rhesus  
164 macaques, viral RNA was detected in one animal at three dpc, whilst in cynomolgus  
165 macaques, viral RNA was detected in two animals at six dpc.

166

167 Samples collected from the upper respiratory tract at each study time point were  
168 evaluated using a Vero cell-based plaque assay for the presence of viable virus.  
169 Viable virus was successfully recovered from two of the six rhesus macaques and  
170 three of the six cynomolgus macaques on the first occasion of sampling (one to three

171 dpc). In all cases, recovery was below 100 pfu/mL based on a figure of under 10  
172 plaques in a single well. Virus was not recovered from any nasal wash samples  
173 collected from four dpc onwards.

174

### 175 **Pathological changes**

176 Gross pathological changes were found in the lungs of all animals from both species  
177 and sexes euthanised 4/5 days after challenge and consisted of multiple areas of  
178 mild to moderate consolidation distributed in cranial and caudal lobes. At 14/15 and  
179 18/19 dpc, only small areas of consolidation were observed. Macroscopic  
180 remarkable changes were not observed in any other organ analysed in this study at  
181 any time point.

182 Histological changes in the lungs of all twelve animals from both species, consistent  
183 with infection with SARS-CoV-2, were observed. The changes were most prominent  
184 at 4/5 dpc and thereafter were less severe, indicating resolution of the more acute  
185 changes observed at early time points.

186

187 4/5 days after challenge, the lung parenchyma in the cynomolgus macaques was  
188 comprised of multifocal to coalescing areas of pneumonia, surrounded by unaffected  
189 parenchyma. Overall, diffuse alveolar damage (DAD) was a prominent feature in the  
190 affected areas, characterised by individual, shrunken, eosinophilic cells in alveolar  
191 walls, with pyknotic or karyorrhectic nuclei (Figure 3A). In these areas, alveolar  
192 spaces were often obliterated by collapse of the thickened and damaged alveolar  
193 walls which contained mixed inflammatory cells (Figure 3A); or had obvious, alveolar  
194 type 2 pneumocyte hyperplasia (alveolar epithelialisation), as well as expanded  
195 alveolar spaces (Figure 3B). Alveolar spaces were expanded and filled with fibrillar



196 to homogenous, eosinophilic, proteinaceous fluid (alveolar oedema) (Figure 3A),  
197 admixed with fibrin, polymorph neutrophils (PMNs), enlarged alveolar macrophages  
198 and other round cells (possibly detached type 2 pneumocytes). In distal bronchioles  
199 and bronchiolo-alveolar junctions, degeneration and sloughing of epithelial cells was  
200 present, with areas of attenuation and foci of plump, type 2 pneumocytes  
201 representing regeneration.

202

203 In the larger airways occasional, focal, epithelial degeneration and sloughing was  
204 observed in the bronchial epithelium, with evidence of regeneration, characterised by  
205 small, basophilic epithelial cells. Low numbers of mixed inflammatory cells,  
206 comprising PMNs, lymphoid cells, and occasional eosinophils, infiltrated bronchial  
207 and bronchiolar walls. In the lumen of some airways, fibrillar, eosinophilic material  
208 (mucus), admixed with degenerative cells, mainly PMNs and epithelial cells, was  
209 seen. Occasionally, multinucleated cells, characterised as large, irregularly shaped  
210 cells with prominent, eosinophilic cytoplasm and multiple round nuclei, resembling  
211 syncytial cells (Figure 3B, inset) were observed.

212

213 Pathological changes consistent with those described for cynomolgus macaques  
214 were present in the lungs of rhesus macaques. In the parenchyma, multifocal  
215 expansion and infiltration of alveolar walls by inflammatory cells was noted (Figure  
216 3E). Furthermore, in these areas, DAD was observed with patchy alveolar oedema  
217 and hyperplasia of alveolar macrophages (Figure 3F). In the bronchi and  
218 bronchioles, similar changes to those described for cynomolgus macaques were  
219 seen.

220

221 Presence of viral RNA was observed in the lungs from all animals at 4/5 dpc by *in*  
222 *situ* hybridisation. Prominent staining of small foci of cells containing SARS-CoV-2  
223 viral RNA, was observed within the alveolar walls, concomitant with microscopic  
224 changes in cynomolgus macaques (Figure 3C). Staining was not seen in cells or  
225 fluid within the alveolar spaces. Positive cells were also observed rarely in the  
226 bronchus-associated lymphoid tissue (BALT) (Figure 3C, insert). Abundant numbers  
227 of cells expressing IL-6 mRNA were observed within the pulmonary lesions (Figure  
228 3D), with only few positive scattered cells in the healthy parenchyma.

229

230 Small foci of cells staining positive for viral RNA were observed at a low frequency in  
231 the rhesus macaques within the alveolar walls and interalveolar septa of both  
232 animals at 4/5 dpc, concomitant with microscopic changes (Figure 3G). IL-6 mRNA  
233 was also abundant within the lesions (Figure 3H).

234

235 Changes were less severe in all four animals examined at 14/15 dpc. In the  
236 cynomolgus macaques, patchy infiltration of mainly mononuclear cells in the alveolar  
237 walls, with occasional similar cells within alveolar spaces, and parenchymal collapse,  
238 were seen (Figure 3I). Mononuclear cells, primarily lymphocytes also were noted  
239 surrounding and infiltrating the walls of blood vessels and airways (Figure 3J). An  
240 increased prominence of bronchial-associated lymphoid tissue (BALT) was noted. In  
241 the lungs of rhesus macaques, changes in the alveoli and BALT were similar in  
242 appearance and frequency to those described in the cynomolgus macaques, and  
243 perivascular lymphocytic cuffing of small vessels, characterised by concentric  
244 infiltrates of mononuclear cells, was also seen occasionally (Figure 3K and 3L).

245

246 Viral RNA was detected in only a few individual cells in both groups of animals at  
247 14/15 dpc (Figure 3J, insert; 3L, insert). By day 18/19, the changes were similar but  
248 less frequent to those described at day 14/15 in all four animals and viral RNA was  
249 not detected by ISH.

250

251 In summary, using the histopathology scoring system developed here, the scores  
252 were higher in both macaque species at 4/5 dpc compared to 14/15 and 18/19dpc,  
253 mostly due to higher scores in the alveolar damage parameters observed at the early  
254 time point (Figure 4A).

255

256 Overall, there was a high presence of viral RNA at 4/5 dpc which was more  
257 pronounced in the cynomolgus macaques, in contrast only very few positive cells  
258 were observed at 14/15 dpc and none at 18/19 dpc. (Figure 4B). A similar trend was  
259 observed in the presence of IL-6 mRNA with a higher amount at 4/5 dpc, which was  
260 slightly more pronounced in cynomolgus macaques, and lower expression at 14/15  
261 dpc (Figure 4C).

262

263 Viral RNA was observed in scattered epithelial cells in areas of the upper respiratory  
264 tract (nasal cavity, larynx and trachea) of all animals at 4/5 dpc, and not associated  
265 to any remarkable lesion.

266

267 In the liver, microvesicular, centrilobular vacuolation, consistent with glycogen,  
268 together with, small, random, foci of lymphoplasmacytic cell infiltration were noted  
269 rarely (data not shown). This is considered to represent a mild, frequently observed  
270 background lesion. Remarkable changes were not observed in any other tissue. Viral

271 RNA staining was seen only at 4/5 dpc, in occasional, absorbing epithelial and goblet  
272 cells in the small and large intestine. It was not observed in any other tissue  
273 examined.

274

#### 275 **Antibody responses to SARS-CoV-2 infection**

276 Low levels of neutralising antibody were detected by plaque reduction neutralisation  
277 test (PRNT) assay in both cynomolgus and rhesus macaques for the first eight to  
278 nine days post challenge. From day eleven or twelve, both species showed high  
279 neutralising antibody titres which continued at the later time point (14 to 19 dpc). The  
280 neutralisation titres at the later time points were generally higher in the cynomolgus  
281 macaques, although greater variability in titres between different animals was seen  
282 for this species (Figure 5).

283

284 Seroconversion to viral antigens Spike trimer, Receptor Binding Domain (RBD) and  
285 Nucleoprotein were evaluated by ELISA following infection. Specific antibodies  
286 against SARS-CoV-2 were detected in serum collected from both rhesus and  
287 cynomolgus macaques from eight to nine dpc onwards (Figure 6).

288

#### 289 **Frequency of Antigen-Specific IFN- $\gamma$ Secreting Cells Measured by ELISpot**

290 Cellular immune responses induced by SARS-CoV-2 challenge were measured in  
291 peripheral blood mononuclear cells (PBMCs) using an *ex vivo* IFN- $\gamma$  ELISpot assay  
292 and compared to responses measured in uninfected (naïve) age and species  
293 matched control animals (Figure 7). Interrogation of IFN- $\gamma$  spot forming units (SFU)  
294 measured in response to stimulation with overlapping 15-mer spike protein peptide

295 pools indicated that peptides spanning the breadth of the SARS-CoV-2 spike protein  
296 sequence induced cellular immune responses in infected cynomolgus macaques;  
297 whereas, peptide pool (PP) sequences 2-4 and 8 were most immunogenic in rhesus  
298 macaques (Figure 7A-B).

299

300 In rhesus macaques, the IFN- $\gamma$  SFU measured following stimulation with spike  
301 protein peptide megapools (MP) 1-3 did not differ significantly between animals  
302 euthanised at either the day 4-5 (early) or the day 14-19 (late) post-infection time-  
303 point in comparison to SFU frequencies measured in the naïve control animals.  
304 However, comparison of the summed MP 1-3-specific response indicated that  
305 significantly higher SFU frequencies were present in the animals euthanised at the  
306 later time-point ( $P = 0.01$ ) (Figure 7C). By contrast, spike protein MP1-, MP2, and  
307 summed MP-specific responses measured in cynomolgus macaques were all  
308 significantly higher than in naïve control animals at the later post-infection time-point  
309 ( $p = 0.03$ ,  $p = 0.01$ ,  $p = 0.01$ ) (Figure 7D).

310

311 In general, there was a trend for spike protein peptide-specific IFN- $\gamma$  SFU  
312 frequencies measured in PBMC samples collected from cynomolgus macaques to  
313 be greater than those detected in rhesus macaques, although these differences did  
314 not reach statistical significance.

315

316 Spike peptide-specific IFN- $\gamma$  SFU frequencies measured in mononuclear cells  
317 isolated from lung and spleen samples revealed a trend for local cellular immune  
318 responses to be greatest in the animals euthanised at the day 14 to 19 post infection

319 time point, but also that there was substantial variability within the groups at this  
320 stage of infection (Figure 7E).

321

322 **Composition and functional profile of the cell mediated immune response.**

323 To explore changes in the composition of the cellular immune compartment following  
324 SARS-CoV-2 infection, immunophenotyping flow cytometry assays were applied to  
325 PBMCs and lung MNC samples collected at necropsy and from PBMCs collected  
326 from age and species matched uninfected (naïve) animals. Comparison of CD4+ and  
327 CD8+ T-cell frequencies indicated that the proportion of CD8+ T-cells was greater in  
328 cynomolgus macaques prior to, and also after infection when the frequency of the  
329 CD4+ subset increased but remained secondary to the CD8+ population in  
330 peripheral blood and lung MNC (Figure 7F). Similarly, the frequency of  $\gamma\delta$  T-cells in  
331 peripheral blood was higher in cynomolgus macaques but remained consistent  
332 following infection, whereas  $\gamma\delta$  T-cell frequencies appeared more variable in the lung  
333 MNC samples collected from animals euthanised at the early and late post infection  
334 time point (Figure 7G-H). Monocyte subtypes were characterised as classical, non-  
335 classical or intermediate by expression of CD14+ and CD16+. This revealed an  
336 increased frequency of 'transitional' CD14+ CD16+ and 'non-classical' CD14- CD16+  
337 monocyte subsets in PBMCs collected at the later post-infection time point in both  
338 rhesus and cynomolgus species. In contrast, the immunomodulatory non-classical  
339 monocyte population was more abundant in lung tissue samples collected from  
340 rhesus macaques euthanised early after infection in comparison to the later time  
341 points or to cynomolgus macaques (Figure 7I). Cytotoxic and immunomodulatory  
342 natural killer (NK) cell populations were identified within the CD3-, CD159a+  
343 lymphocyte population based on the expression on CD16 and CD56, respectively.

344 Immunomodulatory (CD56+) NK cell populations were detected at higher frequency  
345 in the lung and PBMC of infected macaques in comparison to naïve control animals,  
346 indicating a potential proinflammatory role for this innate lymphoid cell subset in  
347 SARS-CoV-2 infection (Figure 7J).

348

349 To explore the functional profile of T-cell populations, PBMCs were stimulated with  
350 peptide pools spanning the SARS-CoV-2 membrane (M), nucleocapsid (N) or spike  
351 (S) proteins, and the production of the cytokines IFN- $\gamma$ , IL-2, TNF- $\alpha$ , IL-17 and GM-  
352 CSF along with the activation marker CD69 and degranulation marker CD107a  
353 measured by intracellular cytokine staining. Cytokine producing CD4 and CD8 T-  
354 cells were detected in both rhesus and cynomolgus macaques in response to  
355 stimulation with M, N and S peptide pools. Proinflammatory (IFN- $\gamma$  or GM-CSF  
356 producing) T-cells were primarily detected at the later post-challenge time point,  
357 although low frequencies of IL-2 producing CD8+ cells were detected in PBMC  
358 samples collected from cynomolgus macaques in the early post-challenge samples  
359 (Figure 7K). The frequency of Th17 and TNF- $\alpha$  expressing cells differed between the  
360 species with IL-17 producing CD4 and CD8 T-cells more prevalent in rhesus  
361 macaques, whereas TNF $\alpha$  expression was detected more frequently in cynomolgus  
362 macaques. Similarly, cytokine production measured in the  $\gamma\delta$  T-cell population  
363 indicated a trend for greater IL-17 production in PBMCs isolated from rhesus  
364 macaques, although low frequencies of IFN- $\gamma$  and IL-17 producing  $\gamma\delta$  T-cells were  
365 also detected in cynomolgus macaques euthanised at the early post-infection time  
366 point indicating that unconventional T-cell populations play a role in the early  
367 immune response to SARS-CoV-2 infection (Figure 7L). Peptide-specific expression  
368 of the degranulation marker CD107a was assessed as a measure of cell mediated

369 cytotoxicity. CD107a was detected on CD8 and  $\gamma\delta$  T-cells in both rhesus and  
370 cynomolgus macaques, was most potently induced by stimulation with the M protein  
371 peptide pool and detected at higher frequency in cynomolgus macaques at the early  
372 post infection time points (Figure 7M-N). In addition to the above functional  
373 parameters, antigen-specific expression of the activation marker CD69 was  
374 assessed to provide a measure of the overall activation status and SARS-CoV-2  
375 antigen-reactogenicity of T-cell subsets following infection. In general, CD69  
376 expression on CD4, CD8 and  $\gamma\delta$  T-cell populations was higher at the later post  
377 infection timepoints (Figure 7K-L) and expression levels agreed with the detection of  
378 cytokine production in the corresponding T-cell subsets. However, instances of  
379 CD69 expression were also apparent in M, N and S peptide stimulated samples, in  
380 which there was an absence of cytokine or degranulation marker detection,  
381 indicating that these activated cells may have exerted antigen-specific functions  
382 outside of the parameters measured by our ICS assay.

383

384



385 **DISCUSSION**

386 We have shown for the first time in a head to head comparison that the  
387 consequences of challenge with SARS-CoV-2 in rhesus and cynomolgus macaques  
388 are similar and in line with outcomes described in studies conducted individually in  
389 either, rhesus<sup>11,12,15,16</sup> or cynomolgus macaques<sup>13,17</sup>.

390

391 The clinical manifestations in human COVID-19 patients range from asymptomatic to  
392 severe<sup>18-20</sup>. In our study, we have observed that SARS-CoV-2 induced features  
393 characteristic of COVID-19 identified on CT scans in the absence of clinical signs in  
394 both rhesus and cynomolgus macaques. The lack of clinical signs observed agrees  
395 with other reports that used the IN and IT routes of challenge delivery<sup>11,13,15,17</sup>. The  
396 slightly increased levels of clinical changes previously described in rhesus<sup>12,21,22</sup>  
397 may be due to the use of the ocular and oral routes in addition to IN and IT for  
398 challenge and the potential impact of additional in-life sampling. CT provided the only  
399 clinical measure that identified abnormalities *in vivo* consistent with COVID-19 and is  
400 therefore a critical tool for evaluation of disease burden following experimental  
401 infection. Features characteristic of COVID-19 in human patients, such as ground  
402 glass opacity, consolidation and crazy paving were identified on CT scans collected  
403 from both SARS-CoV-2 challenged rhesus and cynomolgus macaques in line with  
404 reports from studies describing SARS-CoV-2 infection in either, rhesus<sup>21</sup>, or  
405 cynomolgus macaques<sup>17</sup> supporting a role for both species as models of human  
406 SARS-CoV-2 induced disease.

407

408 The pattern of viral shedding from the URT (peak day one to three with subsequent  
409 decline to undetectable), intermittent low recovery from the gastrointestinal tract and

410 absence of detection in the blood described across both species is similarly to what  
411 is observed in humans with asymptomatic/mild COVID-19 (shedding without clinical  
412 signs and/or after resolution of clinical course) and reflect previous reports of SARS-  
413 CoV-2 infection in rhesus <sup>11,12,15,16</sup> and cynomolgus macaques <sup>13,17</sup>. Similar to these  
414 studies, virus shed from the URT was detected by RT-qPCR very shortly after  
415 challenge, which could suggest the presence of residual challenge material rather  
416 than shedding of newly replicated virus resulting from infection. However, similar to  
417 Rockx et al., 2020, live virus was also detected, albeit at low levels, early after  
418 challenge which suggests some level of new virus replication which is also supported  
419 by the level of virus detected using RNA probes conducted on samples collected  
420 from animals euthanised 4/5 dpc (13).

421

422 Histopathological changes were comparable in both animal species, and closely  
423 resembled that seen in human cases following a mild/moderate clinical course.  
424 Typical changes of acute respiratory distress syndrome (ARDS) were observed, with  
425 DAD and alveolar hyperplasia seen on microscopy together with interstitial lymphoid  
426 infiltrates, focally showing perivascular cuffing. These histopathological lesions are  
427 compatible to those observed in human patients, although some features seen in  
428 humans, such as thromboembolic changes, were not present in the macaques <sup>23</sup>.  
429 The pathology at 14/15 and 18/19 dpc showed signs of resolution with some focal  
430 alveolar hyperplasia. We have described here a histopathology scoring system that  
431 allow us to quantify the severity of lesions in the airways and parenchyma of lung  
432 tissue sections from SARS-CoV-2 infected macaques. This system might prove to be  
433 very useful to compare quantitatively the lung histopathology observed in new  
434 vaccine and therapeutic trials.

435 We have also described herein an upregulation of local interleukin-6 production  
436 within the pulmonary lesions at the early time points of the infection in both species.  
437 The induction of a proinflammatory cytokine storm has been described in human  
438 COVID-19 patients, with IL-6 levels significantly elevated and associated with the  
439 disease severity<sup>24,25</sup>.

440

441 The development of neutralising titres of specific antibodies is important for the  
442 control of infection and viral transmission and is a commonly reported feature in  
443 COVID-19 patients, although neutralising antibody alone is not considered sufficient  
444 for protection against severe disease<sup>26</sup>. IgG seroconversion occurred in both  
445 macaque species from days 8-9 post infection and therefore follows a similar kinetic  
446 to serology profiles measured in COVID-19 patients<sup>27</sup>, indicating that both species  
447 offer representative models for the investigation of SARS-CoV-2 related humoral  
448 immunity.

449

450 In keeping with the generally mild pathology and limited evidence of viral replication  
451 or persistence reported in both macaque species, we detected little evidence in  
452 cellular immune profiles of the immune dysregulation associated with severe COVID-  
453 19 disease in humans<sup>28</sup>. Immunological features were more typical of those reported  
454 in milder infections and convalescent patients and included changes in the frequency  
455 of CD4 and CD8 T-cell populations<sup>29</sup> as well as increased frequencies of  
456 immunomodulatory NK<sup>30</sup> and monocyte subsets<sup>31</sup>.

457

458 The role of T-cells in SARS-CoV-2 immunity is not fully defined, although, it is clear  
459 that CD4 and CD8 memory T-cells are present in COVID-19 convalescent patients

460 and those previously exposed to related coronaviruses <sup>32</sup>. CD4 T-cell dependent  
461 mechanisms of protection have been demonstrated in small animal models of SARS-  
462 CoV infection <sup>33</sup>, T-cells are likely to play an important role in the development of  
463 neutralising antibodies <sup>34</sup> and the clearance of infection through cell mediated  
464 cytotoxicity <sup>26</sup>. Our findings confirm that pro-inflammatory and cytotoxic T-cells are  
465 induced by SARS-CoV-2 infection in both rhesus and cynomolgus macaques to a  
466 similar extent, and that there is T-cell reactivity in both species to all three of the  
467 SARS-CoV-2 antigens included in our assays. This included the detection of antigen-  
468 specific immune responses directed toward peptide-epitopes spanning the S protein  
469 sequence, an antigen incorporated into several of the novel vaccine candidates  
470 currently under investigation <sup>35</sup>, thus demonstrating the value of the macaque model  
471 for immunogenicity testing of novel SARS-CoV-2 vaccine constructs. Additionally, in  
472 a comparative study of colonisation of NHPs by group A *Streptococcus pyogenes* it  
473 was reported that cynomolgus developed a stronger antibody response compared to  
474 rhesus macaques <sup>36</sup>, a trend that we also observed.

475

476 Our results demonstrate that both species provide authentic models of SARS-CoV-2  
477 infection, that reflect upper and lower respiratory tract infection resulting in a lung  
478 injury, repair and resolution picture typical for milder forms of COVID-19 disease in  
479 humans. Both macaque models potentially represent the majority of the human  
480 population and enable evaluation of the safety and efficacy of novel and repurposed  
481 interventions against SARS-CoV-2 using endpoints of upper and lower respiratory  
482 tract virus replication, in addition to CT and histopathology in the assessment of  
483 significant but transient lung injury. However, further work is needed to develop  
484 models that are representative of the more severe outcomes that would particularly

485 enable evaluation of the impact of therapies on host mediated pathology associated  
486 with high levels of prolonged, pulmonary disease. Given the limitations in  
487 reproducing the range of underlying health conditions in humans that link to poorer  
488 infection outcomes (e.g. diabetes, obesity and age) in macaques, other strategies of  
489 disease enhancement such as challenge, route, dose, strain, or manipulation of the  
490 host immunity, will be required.

491

492 The limited supply of rhesus macaques is now impacting on future COVID-19 studies  
493 to support the development of vaccines and therapeutic products <sup>37</sup>. The potential  
494 offered by cynomolgus macaques as an appropriate model will greatly increase the  
495 international community's ability to perform these critical studies in support of pre-  
496 clinical evaluation and product licensure. Moreover, cynomolgus macaques with a  
497 Mauritian genotype have more restricted genetic variability and more limited and  
498 better-defined MHC, providing an advantage in the battle to elucidate correlates of  
499 protective immunity. These features have been of particular value in HIV vaccine  
500 research where models are established in both rhesus macaques (Indian genotype)  
501 and cynomolgus macaques (Mauritian genotype) <sup>38</sup>. The MHC homogeneity  
502 associated with the Mauritian cynomolgus macaque has reduced the variability  
503 between animals after vaccination and has enhanced comparisons of vaccine  
504 regimens. In addition, the improved consistency in outcome facilitates the use of  
505 fewer animals to obtain statistically significant results than would be required if more  
506 genetically diverse species were to be used.

507

508

509 **METHODS**

510

511 **Animals**

512 Six cynomolgus macaques of Mauritian origin (*Macaca fascicularis*) and six rhesus  
513 macaques of Indian origin (*Macaca mulatta*) were used in this study. Study groups  
514 comprised three males and three females of each species and all were adults aged 2  
515 to 4 years and weighing between 2.89 and 4.85kg at time of challenge. Before the  
516 start of the experiment, socially compatible animals were randomly assigned to  
517 challenge groups, to minimise bias.

518

519 Animals were housed in compatible social groups, in cages in accordance with the  
520 UK Home Office Code of Practice for the Housing and Care of Animals Bred,  
521 Supplied or Used for Scientific Procedures (2014) and National Committee for  
522 Refinement, Reduction and Replacement (NC3Rs) Guidelines on Primate  
523 Accommodation, Care and Use, August 2006<sup>39</sup>. Prior to challenge animals were  
524 housed at Advisory Committee on Dangerous Pathogens (ACDP) level two in cages  
525 approximately 2.5M high by 4M long by 2M deep, constructed with high level  
526 observation balconies and with a floor of deep litter to allow foraging. Following  
527 challenge animals were transferred to ACDP Level three and housed in banks of  
528 cages of similar construction placed in directional airflow containment systems that  
529 allowed group housing and environmental control whilst providing a continuous,  
530 standardised inward flow of fully conditioned fresh air identical for all groups.  
531 Additional environmental enrichment was afforded by the provision of toys, swings,  
532 feeding puzzles and DVDs for visual stimulation. In addition to ad libitum access to  
533 water and standard old-world primate pellets, diet was supplemented with a selection

534 of fresh vegetables and fruit. All experimental work was conducted under the  
535 authority of a UK Home Office approved project license (PDC57C033) that had been  
536 subject to local ethical review at PHE Porton Down by the Animal Welfare and  
537 Ethical Review Body (AWERB) and approved as required by the Home Office  
538 Animals (Scientific Procedures) Act 1986. Animals were sedated by intramuscular  
539 (IM) injection with ketamine hydrochloride (Ketaset, 100mg/ml, Fort Dodge Animal  
540 Health Ltd, Southampton, UK; 10mg/kg) for procedures requiring removal from their  
541 housing. None of the animals had been used previously for experimental  
542 procedures.

543

#### 544 **Viruses and Cells.**

545 SARS-CoV-2 Victoria/01/2020<sup>40</sup> was generously provided by The Doherty Institute,  
546 Melbourne, Australia at P1 after primary growth in Vero/hSLAM cells and  
547 subsequently passaged twice at PHE Porton in Vero/hSLAM cells [ECACC  
548 04091501]. Infection of cells was with ~0.0005 MOI of virus and harvested at day 4 by  
549 dissociation of the remaining attached cells by gentle rocking with sterile 5 mm  
550 borosilicate beads followed by clarification by centrifugation at 1,000 x g for 10 mins.  
551 Whole genome sequencing was performed, on the P3 challenge stock, using both  
552 Nanopore and Illumina as described previously<sup>41</sup>. Virus titre of the challenge stocks  
553 was determined by plaque assay on Vero/E6 cells [ECACC 85020206]. Cell lines  
554 were obtained from the European Collection of Authenticated Cell Cultures (ECACC)  
555 PHE, Porton Down, UK. Cell cultures were maintained at 37°C in Minimum essential  
556 medium (MEM) (Life Technologies, California, USA) supplemented with 10% foetal  
557 bovine serum (FBS) (Sigma, Dorset, UK) and 25 mM HEPES (Life Technologies,  
558 California, USA). In addition, Vero/hSLAM cultures were supplemented with 0.4

559 mg/ml of geneticin (Invitrogen) to maintain the expression plasmid. Challenge  
560 substance dilutions were conducted in phosphate buffer saline (PBS). Inoculum ( $5 \times$   
561  $10^6$  PFU) was delivered by intratracheal route (2 ml) and intranasal instillation (1.0 ml  
562 total, 0.5 ml per nostril).

563

#### 564 **Clinical signs and in-life imaging by computerised tomography**

565 Weight and body temperature were monitored daily. Nasal washes, throat and rectal  
566 swabs were taken at intervals of three days for each individual, having samples from  
567 at least two animals for each species until five dpc. Whole blood and serum were  
568 collected at the same time points. Nasal washes were obtained by flushing the nasal  
569 cavity with 2 ml PBS. For throat swabs, a flocced swab (MWE Medical Wire,  
570 Corsham, UK) was gently stroked across the back of the pharynx in the tonsillar  
571 area. Throat and rectal swabs were processed, and aliquots stored in viral transport  
572 media (VTM) and AVL buffer (Qiagen, Milton Keynes, UK) at  $-80^{\circ}\text{C}$  until assay.

573

574 Animals were monitored multiple times per day for behavioural and clinical changes.  
575 Behaviour was evaluated for contra-indicators including depression, withdrawal from  
576 the group, aggression, changes in feeding patterns, breathing pattern, respiration  
577 rate and cough. Prior to blood sample collection, aerosol challenge and euthanasia,  
578 animals were weighed, examined for gross abnormalities and body temperature  
579 measured.

580

581 CT scans were performed at 18 dpc from the four remaining animals at this time  
582 point. CT imaging was performed on sedated animals using a 16 slice Lightspeed  
583 CT scanner (General Electric Healthcare, Milwaukee, WI, USA) in the prone and



584 supine position to assist the differentiation of pulmonary changes at the lung bases  
585 caused by gravity dependant atelectasis, from ground glass opacity caused by  
586 SARS-CoV-2. All axial scans were performed at 120 KVp, with Auto mA (ranging  
587 between 10 and 120) and were acquired using a small scan field of view. Rotation  
588 speed was 0.8 s. Images were displayed as an 11 cm field of view. To facilitate full  
589 examination of the cardiac and pulmonary vasculature, lymph nodes and  
590 extrapulmonary tissues, Niopam 300 (Bracco, Milan, Italy), a non-ionic, iodinated  
591 contrast medium, was administered intravenously (IV) at 2 ml/kg body weight and  
592 scans were collected immediately after injection and ninety seconds from the mid-  
593 point of injection. Scans were evaluated by an expert thoracic radiologist, blinded to  
594 the animal's clinical status, for the presence of: disease features characteristic of  
595 COVID-19 in humans (ground glass opacity (GGO), consolidation, crazy paving,  
596 nodules, peri-lobular consolidation; distribution: upper, middle, lower, central 2/3,  
597 bronchocentric); pulmonary embolus and the extent of any abnormalities estimated  
598 (<25%, 25-50%, 51-75%, 76-100%).

599

#### 600 **Post-mortem examination and histopathology**

601 Animals were euthanised at 3 different time-points, in groups of four (including one  
602 animal from each species and sex) at 4/5, 14/15 and 18/19 dpc.

603

604 Animals were anaesthetised with ketamine (17.9 mg/kg bodyweight) and  
605 exsanguination was performed via cardiac puncture, followed by injection of an  
606 anaesthetic overdose (sodium pentobarbitone Dolelethal, Vetquinol UK Ltd, 140  
607 mg/kg) to ensure euthanasia. Post-mortem examination and sample collection was  
608 performed immediately after confirmation of death.

609

610 The bronchial alveolar lavage fluid (BAL) was collected at necropsy from the right  
611 lung. The left lung was dissected prior to BAL collection and used for subsequent  
612 histopathology and virology procedures. At necropsy nasal washes, throat and rectal  
613 swabs, whole blood and serum were taken alongside tissue samples for  
614 histopathology.

615

616 Samples from the left cranial and left caudal lung lobe together with spleen, kidney,  
617 liver, mediastinal and axillary lymph nodes, small intestine (duodenum, jejunum and  
618 ileum), large intestine (caecum and colon), encephalon (cerebrum, cerebellum and  
619 brainstem), eye, trachea, larynx and nasal cavity, were fixed by immersion in 10%  
620 neutral-buffered formalin and processed routinely into paraffin wax. Nasal cavity  
621 samples were decalcified using an EDTA-based solution prior to embedding. Four  
622  $\mu\text{m}$  sections were cut and stained with haematoxylin and eosin (H&E) and examined  
623 microscopically. A lung histopathology scoring system was setup and used to  
624 evaluate the severity of the histopathological lesions observed in each animal (Table  
625 1), including lesions affecting the airways and the parenchyma. Three tissue sections  
626 from each left lung lobe were used to evaluate the lung histopathology.

627

628 In addition, samples were stained using the RNAscope technique to identify the  
629 SARS-CoV-2 virus RNA or Interleukin 6 (IL-6) in lung tissue sections. Briefly, tissues  
630 were pre-treated with hydrogen peroxide for 10 mins (RT), target retrieval for 15  
631 mins (98-102°C) and protease plus for 30 mins (40°C) (Advanced Cell Diagnostics).  
632 A V-nCoV2019-S probe (SARS-CoV-2 Spike gene specific), or host species specific  
633 IL-6-S probes (Advanced Cell Diagnostics, Bio-technique) were incubated on the

634 tissues for two hours at 40°C. In addition, samples were stained using the RNAscope  
635 technique to identify the SARS-CoV-2 virus RNA. Amplification of the signal was  
636 carried out following the RNAscope protocol using the RNAscope 2.5 HD Detection  
637 kit – Red (Advanced Cell Diagnostics, Biotechne).

638

639 Digital image analysis was performed in RNAscope labelled slides to ascertain the  
640 percentage of stained cells within the lesions, by using the Nikon-NIS-Ar package.  
641 The presence of viral RNA by ISH was evaluated using the whole lung tissue section  
642 slides. For IL-6 mRNA, the areas of histopathological lesions were selected as  
643 regions of interest (ROI) and the positively labelled area (red) was calculated by the  
644 software after setting the thresholds.

645

#### 646 **Viral load quantification by RT-qPCR**

647 RNA was extracted using the QIAamp Viral RNA Mini Kit (Qiagen) following  
648 manufacturer's instruction with final elution in 60 µl nuclease free water. Reverse  
649 transcription-quantitative polymerase chain reaction (RT-qPCR) was performed  
650 using TaqPath™ 1-Step RT-qPCR Master Mix, CG (Applied Biosystems™), 2019-  
651 nCoV CDC RUO Kit (Integrated DNA Technologies) and 7500 Fast Real-Time PCR  
652 System (Applied Biosystems™) as previously described <sup>42</sup>. PCR amplicons were  
653 quantified against 2019-nCoV\_N\_Positive Control (Integrated DNA Technologies).  
654 Positive samples detected below the lower limit of quantification (LLOQ) of 20  
655 copies/µl were assigned the value of 13 copies/µl, undetected samples were  
656 assigned the value of ≤6.2 copies/µl, equivalent to the assays LLOD. For extracted  
657 samples this equates to an LLOQ of 8.57x10<sup>3</sup> copies/ml and LLOD of 2.66x10<sup>3</sup>  
658 copies/ml.

659

660

661

662 **Plaque assay**

663 Samples were incubated in 24-well plates (Nunc, ThermoFisher Scientific,  
664 Loughborough, UK) containing twice washed with Dulbecco's PBS (DPBS)  
665 monolayers of Vero E6 cells seeded the previous day at  $1.5 \times 10^5$  cells/well under  
666 Overlay media consisting of MEM (Life Technologies) containing 1.5%  
667 carboxymethylcellulose (Sigma), 4% (v/v) heat-inactivated foetal calf serum (FCS)  
668 (Sigma) and 25mM HEPES buffer (Gibco). After incubation at 37°C for 120 hours,  
669 they were fixed overnight with 10% (w/v) formalin/PBS, washed with tap water and  
670 stained with methyl crystal violet solution (0.2% v/v in 40% (v/v) Ethanol) (Sigma).

671

672 **Plaque reduction neutralisation test**

673 Neutralising virus titres were measured in heat-inactivated (56°C for 30 minutes)  
674 serum samples. SARS-CoV-2 was diluted to a concentration of  $1.4 \times 10^3$  pfu/ml (70  
675 pfu/50 µl) and mixed 50:50 in 1% FCS/MEM with doubling serum dilutions from 1:10  
676 to 1:320 in a 96-well V-bottomed plate. The plate was incubated at 37°C in a  
677 humidified box for one hour to allow the antibody in the serum samples to neutralise  
678 the virus. The neutralised virus was transferred into the wells of a washed plaque  
679 assay 24-well plate (see plaque assay method), allowed to adsorb at 37°C for a  
680 further hour, and overlaid with plaque assay overlay media. After five days  
681 incubation at 37°C in a humidified box, the plates were fixed, stained and plaques  
682 counted.

683

684 A mid-point probit analysis was used to determine the dilution of antibody required to  
685 reduce SARS-CoV-2 viral plaques by 50% (PRNT50) compared with the virus only  
686 control (n=5). Analysis was conducted in R<sup>43</sup> and the script was based on a source  
687 script from Johnson et al., 2013<sup>44</sup>.

688

## 689 **ELISA**

690 A full length trimeric and stabilised version of the SARS-CoV-2 Spike protein (amino  
691 acids 1-1280, GenBank: MN MN908947) was developed and kindly provided by  
692 Florian Krammer's lab as previously described<sup>45</sup>. Recombinant SARS-CoV-2  
693 Receptor-Binding-Domain (319-541) Myc-His was developed and kindly provided by  
694 MassBiologics, USA. Recombinant SARS-CoV-2 Nucleocapsid phosphoprotein  
695 (GenBank: MN908947, isolate Wuhan-Hu-1) was expressed and purified from  
696 Escherichia coli as full-length nucleoprotein (amino acids 1-419) with a C-terminal  
697 6xHis-Tag (REC31812-100, Batch #20042310, Native Antigen Company).

698

699 Spike-, Spike RBD- and NP-specific IgG responses were determined by ELISA.  
700 High-binding 96-well plates (Nunc Maxisorp) were coated with 50 µl per well of 2  
701 µg/ml Spike trimer, Spike RBD or NP in 1X PBS (Gibco) and incubated overnight at  
702 4°C. The ELISA plates were washed five times with wash buffer (1 X PBS/0.05%  
703 Tween 20 (Sigma)) and blocked with 100 µl/well 5% FBS (Sigma) ) in 1 X PBS/0.1%  
704 Tween 20 for one hour at room temperature. After washing, serum samples  
705 previously 0.5% Triton-inactivated were serially diluted in 10% FBS in 1 X PBS/0.1%  
706 Tween 20, 50 µl/well of each dilution were added to the antigen coated plate and  
707 incubated for two hours at room temperature. Following washing, anti-monkey IgG  
708 conjugated to HRP (Invitrogen) were diluted (1:10,000) in 10% FBS in 1 X PBS/0.1%

709 Tween 20 and 100  $\mu$ l/well were added to the plate, then incubated for one hour at  
710 room temperature. After washing, 1 mg/ml O-Phenylenediamine dihydrochloride  
711 solution (Sigma) was prepared and 100  $\mu$ l per well were added. The development  
712 was stopped with 50  $\mu$ l per well 1 M Hydrochloric acid (Fisher Chemical, J/4320/15)  
713 and the absorbance at 490 nm was read using Softmax 7.0. Endpoint titres and  
714 statistical analyses (Kruskal-Wallis one-way ANOVA) were performed with Graph  
715 Pad Prism 8.0. The cut-off was set at the average Optical Density of samples  
716 collected from naïve animals (Day 0) + 3 Standard Deviation.

717

### 718 **Mononuclear cell Isolation**

719 PBMCs were isolated from whole blood anticoagulated with heparin (132 Units per 8  
720 ml blood) (BD Biosciences, Oxford, UK) using standard methods. Of note is that the  
721 material used for density gradient centrifugation was adjusted dependent on the  
722 macaque species, with a Ficoll Histopaque gradient (GE Healthcare, USA) used with  
723 Rhesus macaque blood and a Percoll gradient (GE Healthcare) used with  
724 cynomolgus macaques. Mononuclear cells (MNC) were isolated from spleen and  
725 lung tissue samples using an OctoMACS tissue dissociation device (Miltenyi Biotec).  
726 Lung tissue samples were dissected into approximately 5mm<sup>3</sup> pieces and incubated  
727 for one hour in a solution of 772.8 U/ml collagenase + 426 U/ml DNase (both from  
728 Sigma) diluted in Earle's balanced salt solution supplemented with 200 mg/ml  
729 Calcium Chloride (Gibco, Life Technologies, Renfrew, UK), at 37°C with continual  
730 gentle mixing of the tube. The homogenised solution was passed through a 70  $\mu$ m  
731 cell filter (BD Biosciences) and the mononuclear cells separated by Ficoll Histopaque  
732 density gradient centrifugation. PBMCs and MNC isolated from tissues were stored  
733 at -180 °C until resuscitated for analysis.

734

735 **Resuscitation of cryopreserved cells**

736 PBMCs and MNC were thawed, washed in R10 medium (consisting of RPMI 1640  
737 supplemented with 2 mM L-glutamine, 50 U/ml penicillin- 50 µg/ml streptomycin, and  
738 10% heat-inactivated FBS) with 1 U/ml of DNase (Sigma), and resuspended in R10  
739 medium and incubated at 37°C 5% CO<sub>2</sub> overnight.

740

741 **ELISPOT**

742 An IFN $\gamma$  ELISpot assay was used to estimate the frequency and IFN $\gamma$  production  
743 capacity of SARS-CoV-2-specific T cells in PBMCs using a human / simian IFN $\gamma$  kit  
744 (MabTech, Nacka. Sweden), as described previously<sup>46</sup>. The cells were assayed at 2  
745 x 10<sup>5</sup> cells per well, unless there were not enough cells, in which case 1 x 10<sup>5</sup> cells  
746 were used. Cells were stimulated overnight with SARS-CoV-2 peptide pools and  
747 'megapools' of the spike protein (Mimotopes, Australia). Ten peptide pools were  
748 used, comprising of 15mer peptides, overlapping by 11 amino acids. The three  
749 megapools were made up as such: Megapool 1 (MP1) comprised peptide pools 1-3,  
750 Megapool 2 (MP2) comprised peptide pools 4-6 and Megapool 3 (MP3) comprised of  
751 peptide pools 7-10. All peptides were used at a concentration of 1.7 µg per well.  
752 Phorbol 12-myristate (Sigma) (100 ng/ml) and ionomycin (CN Biosciences,  
753 Nottingham, UK) (1 mg/ml) were used as a positive control. Results were calculated  
754 to report as spot forming units (SFU) per million cells. All SARS-CoV-2 peptides and  
755 megapools were assayed in duplicate and media only wells subtracted to give the  
756 antigen-specific SFU. ELISPOT plates were analysed using the CTL scanner and  
757 software (CTL, Germany) and further analysis carried out using GraphPad Prism

758 (version 8.0.1) (GraphPad Software, USA) Immunophenotyping and Intracellular  
759 cytokine staining assays. Naïve animal samples were taken from previous studies.

760

761 Intracellular cytokine staining (ICS) and immunophenotyping assays were performed  
762 using  $1 \times 10^6$  PBMC or MNC in R10 medium (described above). For intracellular  
763 cytokine staining, these cells were stimulated with a 10  $\mu\text{g/ml}$  solution of CD28 and  
764 CD49d co-stimulatory antibodies (both from BD Biosciences) and 1 $\mu\text{g/ml}$  of 15-mer  
765 overlapping peptide pools spanning either the SARS-CoV-2 spike (S), nucleocapsid  
766 (N) or membrane glycoprotein (M) sequence (Miltenyi Biotec, Bisley, UK) or 5  $\mu\text{g/ml}$   
767 staphylococcal enterotoxin b (SEB) (Sigma), or R10 medium with matched  
768 concentration of DMSO as negative control, for a total of 16 hours at 37°C, in a 5%  
769 CO<sub>2</sub> supplemented incubator. Anti-CD107a-AF488 (BD Biosciences) was included  
770 during cell stimulations. Following the initial two hours of incubation, the protein  
771 transport inhibitor Brefeldin-A (Sigma) was added at a final concentration of 10  
772  $\mu\text{g/ml}$ . Following incubation, cells were washed with FACS buffer consisting of PBS  
773 + 1% FCS and incubated for 30 minutes at room temperature with optimal dilutions  
774 of the amine-reactive Live/Dead Fixable Red viability cell stain (Life Technologies)  
775 and the antibodies CD4 PerCP-Cy5.5, CD8 APC-Fire750, CD69-BV510, (all from BD  
776 Biosciences) and CD20- Pe-Dazzle-594,  $\gamma\delta$ -TCR-BV421 (Biolegend, London, UK)  
777 prepared in BD Biosciences Brilliant stain buffer (BD Biosciences, Oxford, UK).  
778 Following surface marker staining, the cells were washed and then permeabilised by  
779 incubation at room temperature for 15 minutes with Fix/Perm reagent (BD  
780 Biosciences) before washing with Permwash buffer (BD Biosciences). Intracellular  
781 antigen staining was applied by incubation at room temperature for 30 minutes with  
782 the antibodies CD3-AF700, IFN- $\gamma$ -PeCy7, TNF- $\alpha$ -BUV395, GM-SCF-PE (all from BD



783 Biosciences, Oxford, United Kingdom), IL-2-APC (Miltenyi Biotech Ltd), IL-17-BV711  
784 (Biolegend, London, UK) prepared in brilliant stain buffer. For immunophenotyping  
785 assays, cells were washed with FACs buffer by centrifugation before staining with  
786 amine-reactive Live/Dead Fixable violet viability cell stain as per the manufacturer's  
787 instructions (Life Technologies). Cells were then incubated for 30 minutes at room  
788 temperature with optimal dilutions of the following antibodies: anti-CD4-PerCP-  
789 Cy5.5, anti-CD8-APC-Fire750 anti-CD11c-PE. anti-CD14-APC, anti-CD16-BV786,  
790 anti-CD20-PE-Dazzle (all from BioLegend); anti-CD3-AF700, anti-CD56-BV605, anti-  
791 HLA-DR-BUV395 (all from BD Biosciences); anti-CD159a-PC7 (Beckman Coulter)  
792 prepared in brilliant stain buffer. BD Compbeads (BD Biosciences) were labelled with  
793 the above fluorochromes for use as compensation controls. Following antibody  
794 labelling, cells and beads were washed by centrifugation and fixed in 4%  
795 paraformaldehyde solution (Sigma) prior to flow cytometric acquisition.

796

#### 797 **Flow cytometric acquisition and analysis.**

798 Cells were analysed using a five laser LSRII Fortessa instrument (BD Biosciences)  
799 and data were analysed using FlowJo (version 9.7.6, BD Biosciences). Cytokine-  
800 producing T-cells were identified using a forward scatter-height (FSC-H) versus side  
801 scatter-area (SSC-A) dot plot to identify the lymphocyte population, to which  
802 appropriate gating strategies were applied to exclude doublet events, non-viable  
803 cells and B cells (CD20<sup>+</sup>). For ICS analysis, sequential gating through CD3<sup>+</sup>,  
804 followed by CD4<sup>+</sup> or CD8<sup>+</sup> gates were used before individual cytokine gates to  
805 identify IFN- $\gamma$ , IL-2, TNF- $\alpha$ , GM-CSF and IL-17, CD107a and CD69 stained  
806 populations. In immunophenotyping data sets, classical-, non-classical-monocytes  
807 and monocyte derived dendritic cells (mDCs) were identified by FSC and SSC

808 characteristics and by the expression pattern of HLA-DR, CD14, CD16 and CD11c  
809 within the live CD3<sup>+</sup>, CD20<sup>-</sup> population. Similarly, natural killer cells subsets were  
810 identified by expression of CD8, CD159a, CD56 and CD16 within live CD3<sup>+</sup>  
811 lymphocyte subsets. Polyfunctional cells were identified using Boolean gating  
812 combinations of individual cytokine-producing CD4 or CD8 T-cells. The software  
813 package PESTLE version 1.7 (Mario Roederer, Vaccine Research Centre, NIAID,  
814 NIH) was used for background subtraction to obtain antigen-specific polyfunctional  
815 ICS cytokine responses, Graphpad Prism (version 8.0.1) was used to generate  
816 graphical representations of flow cytometry data.

817

#### 818 **DATA AVAILABILITY:**

819 All data and materials used in the analysis are presented in the main text and  
820 supplementary figures

821

#### 822 **REFERENCES:**

- 823 1 Falsey, A. R. & Walsh, E. E. Novel coronavirus and severe acute respiratory  
824 syndrome. *Lancet* **361**, 1312-1313, doi:10.1016/S0140-6736(03)13084-X  
825 (2003).
- 826 2 de Groot, R. J. *et al.* Middle East respiratory syndrome coronavirus (MERS-  
827 CoV): announcement of the Coronavirus Study Group. *J Virol* **87**, 7790-7792,  
828 doi:10.1128/JVI.01244-13 (2013).
- 829 3 Callaway, E., Cyranoski, D., Mallapaty, S., Stoye, E. & Tollefson, J. The  
830 coronavirus pandemic in five powerful charts. *Nature* **579**, 482-483,  
831 doi:10.1038/d41586-020-00758-2 (2020).
- 832 4 WHO. WHO SITREP 164

- 833 5 Chen, N. *et al.* Epidemiological and clinical characteristics of 99 cases of 2019  
834 novel coronavirus pneumonia in Wuhan, China: a descriptive study. *Lancet*  
835 **395**, 507-513, doi:10.1016/S0140-6736(20)30211-7 (2020).
- 836 6 Huang, C. *et al.* Clinical features of patients infected with 2019 novel  
837 coronavirus in Wuhan, China. *Lancet* **395**, 497-506, doi:10.1016/S0140-  
838 6736(20)30183-5 (2020).
- 839 7 Subbarao, K. & Roberts, A. Is there an ideal animal model for SARS? *Trends*  
840 *Microbiol* **14**, 299-303, doi:10.1016/j.tim.2006.05.007 (2006).
- 841 8 Roberts, A. *et al.* Animal models and vaccines for SARS-CoV infection. *Virus*  
842 *Res* **133**, 20-32, doi:10.1016/j.virusres.2007.03.025 (2008).
- 843 9 McAuliffe, J. *et al.* Replication of SARS coronavirus administered into the  
844 respiratory tract of African Green, rhesus and cynomolgus monkeys. *Virology*  
845 **330**, 8-15, doi:10.1016/j.virol.2004.09.030 (2004).
- 846 10 Rowe, T. *et al.* Macaque model for severe acute respiratory syndrome. *J Virol*  
847 **78**, 11401-11404, doi:10.1128/JVI.78.20.11401-11404.2004 (2004).
- 848 11 Chandrashekar, A. *et al.* SARS-CoV-2 infection protects against rechallenge  
849 in rhesus macaques. *Science*, doi:10.1126/science.abc4776 (2020).
- 850 12 Munster, V. J. *et al.* Respiratory disease in rhesus macaques inoculated with  
851 SARS-CoV-2. *Nature*, doi:10.1038/s41586-020-2324-7 (2020).
- 852 13 Rockx, B. *et al.* Comparative pathogenesis of COVID-19, MERS, and SARS  
853 in a nonhuman primate model. *Science*, doi:10.1126/science.abb7314 (2020).
- 854 14 Caly, L. *et al.* Isolation and rapid sharing of the 2019 novel coronavirus  
855 (SARS-CoV-2) from the first patient diagnosed with COVID-19 in Australia.  
856 *Med J Aust* **212**, 459-462, doi:10.5694/mja2.50569 (2020).

- 857 15 Yu, J. *et al.* DNA vaccine protection against SARS-CoV-2 in rhesus  
858 macaques. *Science*, doi:10.1126/science.abc6284 (2020).
- 859 16 van Doremalen, N. *et al.* A single dose of ChAdOx1 MERS provides  
860 protective immunity in rhesus macaques. *Sci Adv* **6**, eaba8399,  
861 doi:10.1126/sciadv.aba8399 (2020).
- 862 17 Maisonnaise P, G. J., Contresras V, Behillil S, Solas C, Marlin R, Naninck T,  
863 Izzorno A, Lemaitre Jet al. . Hydroxychloroquine in the treatment and  
864 prophylaxis of SARS-CoV-2 infection in non- human primates. (2020).
- 865 18 Yang, X. *et al.* Clinical course and outcomes of critically ill patients with  
866 SARS-CoV-2 pneumonia in Wuhan, China: a single-centered, retrospective,  
867 observational study. *Lancet Respir Med* **8**, 475-481, doi:10.1016/S2213-  
868 2600(20)30079-5 (2020).
- 869 19 Arentz, M. *et al.* Characteristics and Outcomes of 21 Critically Ill Patients With  
870 COVID-19 in Washington State. *JAMA*, doi:10.1001/jama.2020.4326 (2020).
- 871 20 Guan, W. J. *et al.* Clinical Characteristics of Coronavirus Disease 2019 in  
872 China. *N Engl J Med* **382**, 1708-1720, doi:10.1056/NEJMoa2002032 (2020).
- 873 21 Singh, D. K. *et al.* SARS-CoV-2 infection leads to acute infection with dynamic  
874 cellular and inflammatory flux in the lung that varies across nonhuman primate  
875 species. 2020.2006.2005.136481, doi:10.1101/2020.06.05.136481 %J  
876 bioRxiv (2020).
- 877 22 van Doremalen, N. *et al.* ChAdOx1 nCoV-19 vaccination prevents SARS-  
878 CoV-2 pneumonia in rhesus macaques. 2020.2005.2013.093195,  
879 doi:10.1101/2020.05.13.093195 %J bioRxiv (2020).

- 880 23 Carsana, L. *et al.* Pulmonary post-mortem findings in a series of COVID-19  
881 cases from northern Italy: a two-centre descriptive study. *Lancet Infect Dis*,  
882 doi:10.1016/S1473-3099(20)30434-5 (2020).
- 883 24 Herold, T. *et al.* Elevated levels of IL-6 and CRP predict the need for  
884 mechanical ventilation in COVID-19. *J Allergy Clin Immunol*,  
885 doi:10.1016/j.jaci.2020.05.008 (2020).
- 886 25 Chen, X. *et al.* Detectable serum SARS-CoV-2 viral load (RNAemia) is  
887 closely correlated with drastically elevated interleukin 6 (IL-6) level in critically  
888 ill COVID-19 patients. *Clin Infect Dis*, doi:10.1093/cid/ciaa449 (2020).
- 889 26 Vabret, N. *et al.* Immunology of COVID-19: Current State of the Science.  
890 *Immunity* **52**, 910-941, doi:10.1016/j.immuni.2020.05.002 (2020).
- 891 27 Huang, A. T. *et al.* A systematic review of antibody mediated immunity to  
892 coronaviruses: antibody kinetics, correlates of protection, and association of  
893 antibody responses with severity of disease. *medRxiv*,  
894 doi:10.1101/2020.04.14.20065771 (2020).
- 895 28 Giamarellos-Bourboulis, E. J. *et al.* Complex Immune Dysregulation in  
896 COVID-19 Patients with Severe Respiratory Failure. *Cell Host Microbe* **27**,  
897 992-1000 e1003, doi:10.1016/j.chom.2020.04.009 (2020).
- 898 29 Diao, B. *et al.* Reduction and Functional Exhaustion of T Cells in Patients With  
899 Coronavirus Disease 2019 (COVID-19). *Front Immunol* **11**, 827,  
900 doi:10.3389/fimmu.2020.00827 (2020).
- 901 30 Zheng, M. *et al.* Functional exhaustion of antiviral lymphocytes in COVID-19  
902 patients. *Cell Mol Immunol* **17**, 533-535, doi:10.1038/s41423-020-0402-2  
903 (2020).

- 904 31 Yonggang Zhou, B. F., Xiaohu Zheng, Dongsheng Wang, Changcheng Zhao,  
905 Yingjie Qi, Rui Sun, Zhigang Tian, Xiaoling Xu, Haiming Wei Pathogenic T-  
906 cells and inflammatory monocytes incite inflammatory storms in severe  
907 COVID-19 patients. *National Science Review* **7**, 5 (2020).
- 908 32 Grifoni, A. *et al.* Targets of T Cell Responses to SARS-CoV-2 Coronavirus in  
909 Humans with COVID-19 Disease and Unexposed Individuals. *Cell* **181**, 1489-  
910 1501 e1415, doi:10.1016/j.cell.2020.05.015 (2020).
- 911 33 Zhao, J. *et al.* Airway Memory CD4(+) T Cells Mediate Protective Immunity  
912 against Emerging Respiratory Coronaviruses. *Immunity* **44**, 1379-1391,  
913 doi:10.1016/j.immuni.2016.05.006 (2016).
- 914 34 Juno, J. A. *et al.* Humoral and circulating follicular helper T cell responses in  
915 recovered patients with COVID-19. *Nat Med*, doi:10.1038/s41591-020-0995-0  
916 (2020).
- 917 35 Thanh Le, T. *et al.* The COVID-19 vaccine development landscape. *Nat Rev*  
918 *Drug Discov* **19**, 305-306, doi:10.1038/d41573-020-00073-5 (2020).
- 919 36 Skinner, J. M. *et al.* Comparison of rhesus and cynomolgus macaques in a  
920 *Streptococcus pyogenes* infection model for vaccine evaluation. *Microb*  
921 *Pathog* **50**, 39-47, doi:10.1016/j.micpath.2010.10.004 (2011).
- 922 37 Zhang, S. America Is Running Low on a Crucial Resource for COVID-19  
923 Vaccines. *The Atlantic* (2020).
- 924 38 Sui, Y., Gordon, S., Franchini, G. & Berzofsky, J. A. Nonhuman primate  
925 models for HIV/AIDS vaccine development. *Curr Protoc Immunol* **102**, Unit 12  
926 14, doi:10.1002/0471142735.im1214s102 (2013).
- 927 39 National Committee for Refinement, R. a. R. N. R. G. o. P. A., Care and Use.  
928 Non human primate accomodation, care and use. (2006).

- 929 40 Caly, L. *et al.* Isolation and rapid sharing of the 2019 novel coronavirus  
930 (SARS-CoV-2) from the first patient diagnosed with COVID-19 in Australia.  
931 **n/a**, doi:10.5694/mja2.50569.
- 932 41 Lewandowski, K. *et al.* Metagenomic Nanopore Sequencing of Influenza Virus  
933 Direct from Clinical Respiratory Samples. *Journal of Clinical Microbiology* **58**,  
934 e00963-00919, doi:10.1128/JCM.00963-19 (2019).
- 935 42 Ryan, K. A. *et al.* Dose-dependent response to infection with SARS-CoV-2 in  
936 the ferret model: evidence of protection to re-challenge.  
937 2020.2005.2029.123810, doi:10.1101/2020.05.29.123810 %J bioRxiv (2020).
- 938 43 Team, R. C. R: A language and environment for statistical computing. *R*  
939 *Foundation for Statistical Computing, Vienna, Austria* (2019).
- 940 44 Johnson, R. M., Dahlgren, L., Siegfried, B. D. & Ellis, M. D. Acaricide,  
941 fungicide and drug interactions in honey bees (*Apis mellifera*). *PLoS One* **8**,  
942 e54092, doi:10.1371/journal.pone.0054092 (2013).
- 943 45 Amanat, F. *et al.* A serological assay to detect SARS-CoV-2 seroconversion  
944 in humans. *Nat Med*, doi:10.1038/s41591-020-0913-5 (2020).
- 945 46 Sibley, L. S. *et al.* ELISPOT Refinement Using Spot Morphology for  
946 Assessing Host Responses to Tuberculosis. *Cells* **1**, 5-14,  
947 doi:10.3390/cells1010005 (2012).
- 948
- 949

950 **Acknowledgments:** The authors would like to thank J. Druce and M.G. Catton from  
951 the Victorian Infectious Diseases Reference Laboratory, Royal Melbourne Hospital,  
952 At the Peter Doherty Institute for Infection and Immunity, Victoria, 3000, Australia, for  
953 providing the SARS-CoV-2 isolate used in this study. This work was funded by the  
954 Coalition of Epidemic Preparedness Innovations (CEPI).

955

956 **Author contributions:** FJS, KAR, YH, JAT, SGF, KRBw, SS, MJD, SC, BH, and  
957 MWC conceived the study. FJS, LH, CLK, GP, ELR and AGN performed the  
958 pathological analyses. ADW, LS, CS, SLo, O D-P, KG, AM, ALM and TT performed  
959 the immunological studies. KRBw grew viral stock and optimised virology  
960 techniques. SAF, PB, BEC, RC, DJH, TH, CMKH, VL, DN, JP, IT, ST, NRW and  
961 MJD performed animal procedures and sampling processing. GSS, KEG, HEH,  
962 RJW, LA, EB, KRBU, MA, NSC, DK, KJG, JG, RH, SLe, EJP, SP, CT and NW  
963 performed virological and molecular biology techniques. MJE performed statistical  
964 analyses. FVG devised the scan protocols, the scoring system and reported the  
965 CTscans. FJS, ADW, MJD, SS and MWC wrote the first draft of the manuscript that  
966 was accepted by all authors before submission.

967

968 **Competing interests:** No conflicts of interest declared.

969

970

971



972 **FIGURE LEGENDS**

973

974 **Figure 1. Images constructed from CT scans collected 18 days after challenge**  
975 **with SARS-CoV-2 showing pulmonary abnormalities in two cynomolgus (A, B)**  
976 **and one rhesus macaque (C).** Arrows indicate areas of ground glass opacification  
977 and consolidation.

978

979 **Figure 2. Viral RNA detected by RT-qPCR.** Viral load presented as the geometric  
980 mean of cDNA copies/ml, with individual data points overlaid in rhesus macaques  
981 (blue) and cynomolgus macaques (red) in A) nasal wash, B) throat swab, C)  
982 bronchoalveolar lavage (BAL) collected at necropsy (numbers indicate days post  
983 challenge the NHP was euthanised), D) rectal swab, and E) whole blood. Dashed  
984 lines highlight the LLOQ (lower limit of quantification,  $8.57 \times 10^3$  copies/ml) and  
985 LLOD (lower limit of detection,  $2.66 \times 10^3$  copies/ml). Positive samples detected  
986 below the LLOQ were assigned the value of  $5.57 \times 10^3$  copies/ml. Viral RNA was not  
987 detected in naïve animals (data not shown).

988

989 **Figure 3. Histopathological changes in cynomolgus and rhesus macaques**  
990 **during SARS-CoV-2 infection.** Diffuse areas of DAD observed in cynomolgus  
991 macaques at 4/5 dpc with shrunken, eosinophilic cells within the alveolar walls (A,  
992 B), together with alveolar oedema (A, arrows) pneumocyte hyperplasia and  
993 expanded alveolar spaces with inflammatory cell infiltration (B, arrows). Occasional  
994 multinucleated cells resembling syncytial cells are observed (B, insert). ISH detection  
995 of viral RNA (RNAScope, red chromogen) within the areas of pneumonia (C) and  
996 occasionally in the BAL (C, insert). Abundant IL-6 producing cells observed in the

997 areas of pneumonia (D) Similar histopathological changes observed in rhesus  
998 macaques, including DAD areas with patchy alveolar oedema (E, arrow), alveolar  
999 macrophage hyperplasia (F, arrow), bronchial exudates and presence of viral RNA  
1000 within the areas showing pneumonia (G) and abundant IL-6 producing cells (H).  
1001 Histopathological changes with less severity observed at 14/15 dpc in cynomolgus  
1002 macaques, with infiltration of mononuclear cells within alveolar spaces and  
1003 bronchiolar luminae (I, arrows) and parenchymal collapse (I, \*) and perivascular  
1004 cuffing (J, arrow), with minimal detection of viral RNA in pneumocytes (J, insert).  
1005 Bronchiole regeneration (K, arrow) and perivascular/peribronchiolar cuffing observed  
1006 in rhesus macaques at 14/15 dpc (L, arrows), together with BALT proliferation (L, \*)  
1007 with minimal presence of viral RNA (L, insert).

1008

1009 **Figure 4. Lung histopathology scores and presence of viral RNA and IL-6 by**  
1010 **ISH in cynomolgus and rhesus macaques during SARS-CoV-2 infection.**

1011 Heatmap showing the individual and aggregate (TOTAL) scores for each lung  
1012 histopathological parameter and animal (A). Image analysis of positively stained area  
1013 in RNAScope labelled sections for viral RNA (B; whole slide) and IL-6 mRNA (C,  
1014 areas of lesion), showing data for individual animals with mean value for each group  
1015 (box).

1016 **Figure 5. Neutralizing antibodies in serum measured by Plaque reduction**  
1017 **neutralisation test (PRNT<sub>50</sub>).** Serum neutralisation titres as reciprocal highest

1018 dilution resulting in an infection reduction of >50% in samples (PRNT<sub>50</sub>) pre-  
1019 challenge and at 1-3, 4-6, 8-9, 11-12 and 14-19 days post challenge in rhesus  
1020 macaques (blue) and cynomolgus macaques (red). Bars indicating group mean +/-  
1021 standard error with PRNT<sub>50</sub> determined for individual animals shown as circles and

1022 squares respectively. Neutralizing antibodies were observed at 8-9 dpc at low levels,  
1023 increasing from 11dpc onwards, with higher values in cynomolgus macaques  
1024 compared to rhesus.

1025

1026 **Figure 6. SARS-CoV-2-specific IgG antibodies measured by ELISA in naïve and**  
1027 **SARS-CoV-2 infected macaques.** Spike- (A), Receptor-Binding Domain- (B) and  
1028 Nucleoprotein- (C) specific IgG antibodies measured in sera of rhesus and  
1029 cynomolgus macaques. Sera were collected from uninfected animals (day 0) or 1-3,  
1030 4-6, 8-9, 11-12 and 14-19 days following SARS-CoV-2 infection. Bars show the  
1031 group mean +/- SEM with an endpoint titre determined for each individual animal  
1032 shown as squares for males and dots for females. \*  $p \leq 0.05$  (*Kruskal-Wallis one-*  
1033 *way ANOVA*). Experiment performed in duplicates.

1034

1035 **Figure 7. Cellular immune responses to SARS-CoV-2.** A, B) IFN $\gamma$  SFU measured  
1036 in PBMCs and stimulated with spike protein peptide pools (PP) peptide in A) rhesus  
1037 and B) cynomolgus macaques. PBMC samples were isolated from uninfected  
1038 animals (naïve) or at early (days 4 and 5) and late (days 14-19) time-points following  
1039 SARS-CoV-2 infection. Box plots show the group median +/- inter-quartile range,  
1040 with minimum and maximum values connected by whiskers. C, D) IFN $\gamma$  SFU  
1041 measured in PBMC in response to spike protein megapools (MP) in C) rhesus and  
1042 D) cynomolgus macaques or, E) in mononuclear cells isolated from lung and spleen.  
1043 Bars show the group median with SFU measured in individual animals shown as  
1044 dots. \*  $p \leq 0.05$ , \*\*  $p \leq 0.01$ . F-J) Frequency of major lymphocyte and monocyte cell  
1045 populations quantified by immunophenotyping assay F - H) CD4+, CD8+ and  $\gamma\delta$  T-  
1046 cell frequencies in PBMCs and lung cells, I) Monocyte subtype frequency in PBMCs

1047 and lung MNCs, J) Natural killer (NK) cell subset frequency in PBMCs and lung  
1048 MNCs. Stacked bars show the group median with 95% confidence intervals. PBMC:  
1049 Naïve rhesus n=8, early rhesus n= 1, late rhesus n=2, naïve cyno = 7, early cyno  
1050 n=2, late cyno n=2. Lung: early rhesus n= 2, late rhesus n=3, early cyno n=2, late  
1051 cyno n=2. K-N) Intracellular cytokine staining data K-L) Cytokine and activation  
1052 marker detection in CD4+, CD8+ and  $\gamma\delta$  T-cells in PBMCs stimulated with M, N and  
1053 S peptide pools. G-N) CD107a expression in CD8+ and  $\gamma\delta$  T-cells in PBMCs. Bars  
1054 show the group median with cell frequencies measured in individual animals shown as  
1055 dots.

**Table 1. Pulmonary histopathology scoring system**

| Lesion                                                                                                                                   | Score 0 (normal)                                                                                  | Score 1 (minimal)                                                                             | Score 2 (mild)                                                                                                                 | Score 3 (moderate)                                                                                               | Score 4 (severe)                                                                                |
|------------------------------------------------------------------------------------------------------------------------------------------|---------------------------------------------------------------------------------------------------|-----------------------------------------------------------------------------------------------|--------------------------------------------------------------------------------------------------------------------------------|------------------------------------------------------------------------------------------------------------------|-------------------------------------------------------------------------------------------------|
| <b>Bronchial epithelial degeneration/necrosis with presence of exudates and/or inflammatory cell infiltration</b>                        | None                                                                                              | Occasional (1 or 2) bronchi affected.                                                         | Present in multiple airways; <b>up to 25% of bronchi affected</b>                                                              | Present in multiple airways; <b>between 26-50% of bronchi affected</b>                                           | Present in multiple airways; <b>over 50% of bronchi affected</b>                                |
| <b>Bronchiolar (primarily terminal) epithelial degeneration/necrosis with presence of exudates and/or inflammatory cell infiltration</b> | None                                                                                              | Occasional (1 or 2) bronchioli affected                                                       | Present in multiple airways; <b>up to 25% of bronchioli affected</b>                                                           | Present in multiple airways; <b>between 26-50% of bronchioli affected</b>                                        | Present in multiple airways; <b>over 50% of bronchioli affected</b>                             |
| <b>Perivascular inflammatory infiltrates (cuffing)</b>                                                                                   | None                                                                                              | <b>Occasional</b> incomplete, or loosely formed cuffs                                         | <b>Numerous</b> cuffs; predominantly <b>incomplete</b> and <b>loosely formed</b> with <b>lesser well-formed complete cuffs</b> | <b>Numerous</b> cuffs; approximately <b>half or more</b> well-formed, and may have <b>few broad, dense cuffs</b> | <b>Numerous</b> cuffs; <b>predominantly well-formed</b> with <b>numerous broad, dense cuffs</b> |
| <b>Peribronchiolar inflammatory infiltrates (cuffing)</b>                                                                                | None                                                                                              | <b>Occasional</b> incomplete, or loosely formed cuffs                                         | <b>Numerous</b> cuffs; predominantly <b>incomplete</b> and <b>loosely formed</b> with <b>lesser well-formed complete cuffs</b> | <b>Numerous</b> cuffs; approximately <b>half or more</b> well-formed, and may have <b>few broad, dense cuffs</b> | <b>Numerous</b> cuffs; <b>predominantly well-formed</b> with <b>numerous broad, dense cuffs</b> |
| <b>Acute diffuse alveolar damage (necrosis of pneumocytes)</b>                                                                           | None                                                                                              | Small numbers of foci; <b>up to 5% of slide affected</b>                                      | Multiple foci; <b>between 6-25% of the slide affected</b>                                                                      | Increased numbers of foci; <b>between 26-50% of the slide affected</b>                                           | Numerous foci; <b>over 50% of the slide affected</b>                                            |
| <b>Alveolar cellular exudate and oedema and/or fibrin</b>                                                                                | None (alveolar macrophages at physiological levels)                                               | <b>Occasional</b> alveoli; <b>up to 5% of slide affected</b>                                  | Confluent alveoli; <b>between 6-25% of the slide affected</b>                                                                  | Confluent alveoli; <b>between 26-50% of the slide affected</b>                                                   | Confluent alveoli; <b>affecting over 50% of the slide</b>                                       |
| <b>Alveolar septal inflammatory cells and cellularity</b>                                                                                | Normal septae; typically 1-2 (occasionally 3) nucleated cells wide; absence of inflammatory cells | Thickening of the alveolar walls by inflammatory cells; <b>up to 5% of the slide affected</b> | Thickening of the alveolar walls by inflammatory cells; <b>between 6-25% of the slide affected</b>                             | Thickening of the alveolar walls by inflammatory cells; <b>between 26-50% of the slide affected</b>              | Thickening of the alveolar walls by inflammatory cells; <b>over 50% of the slide affected</b>   |

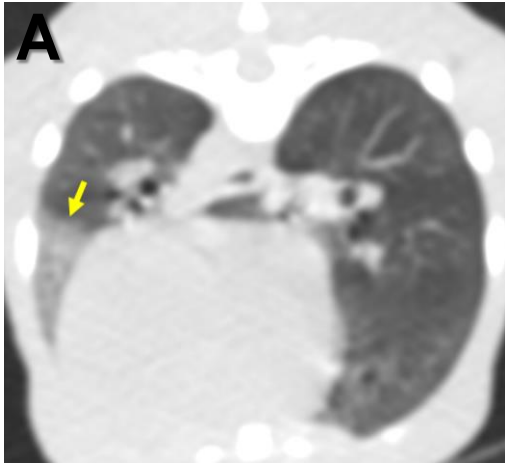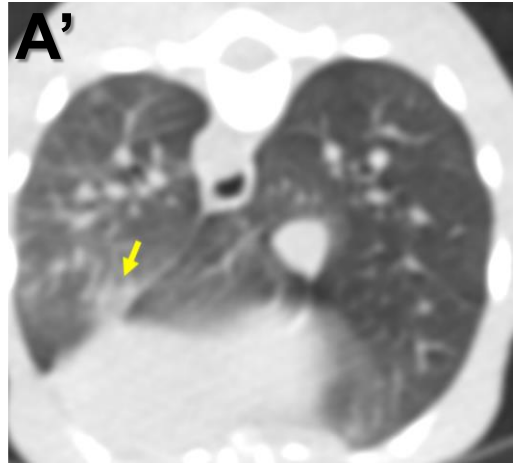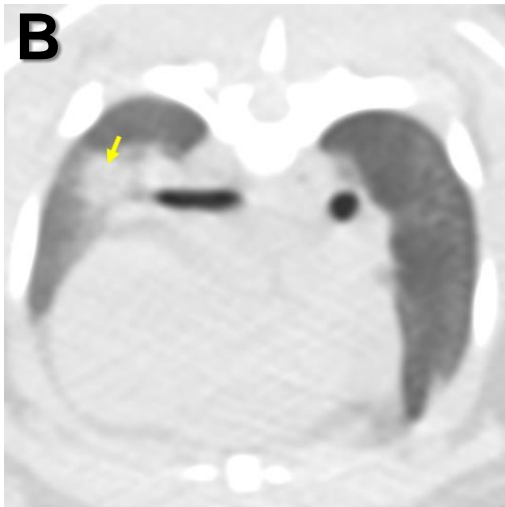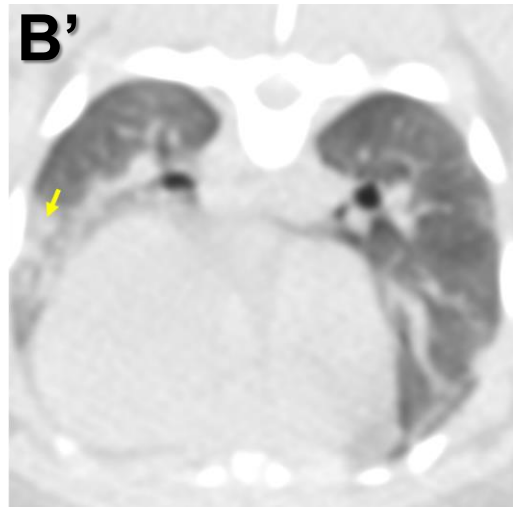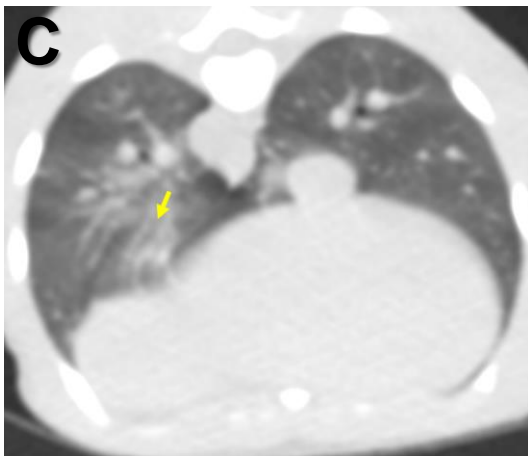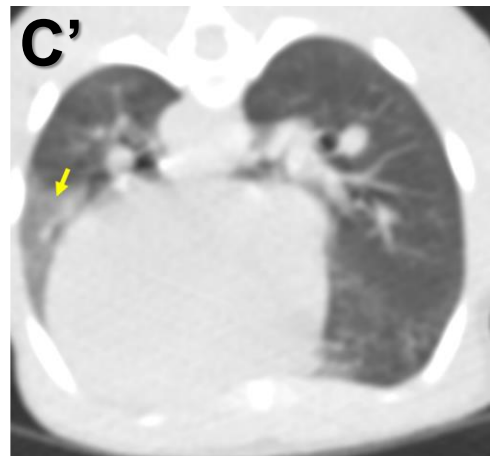

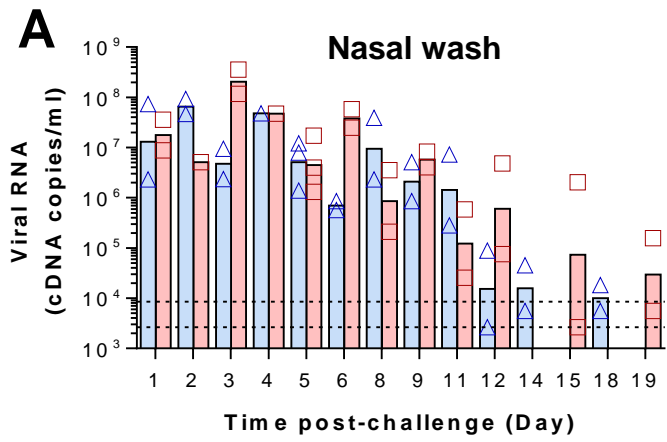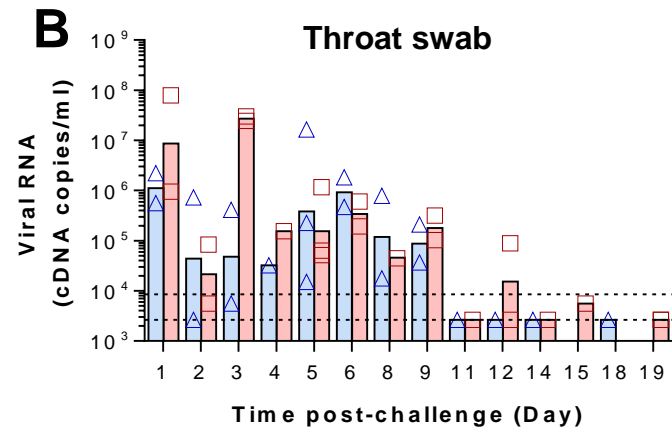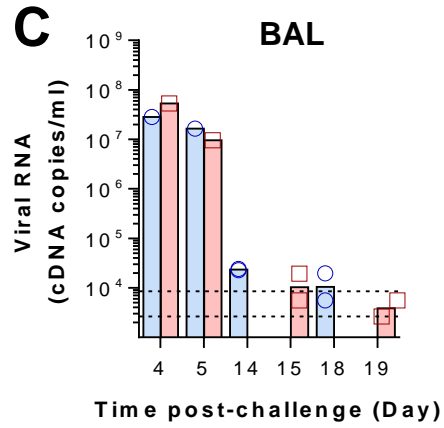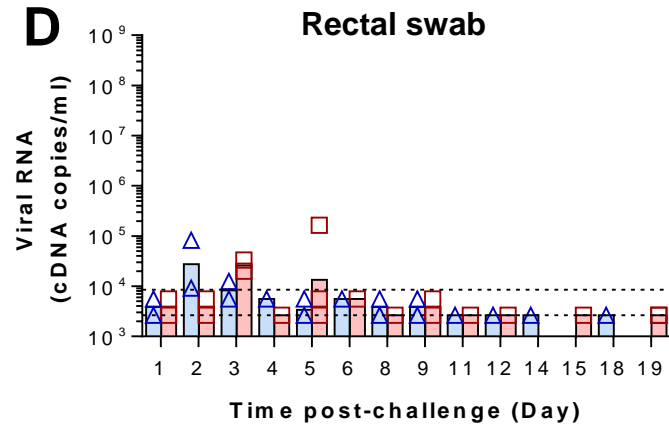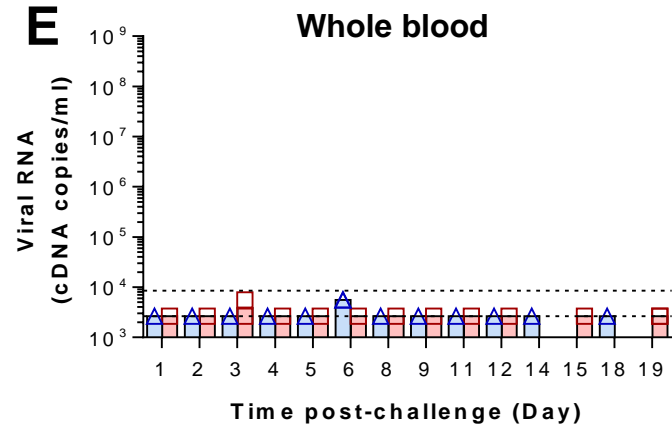



# Cynomolgus macaques

# Rhesus macaques

4/5 dpc

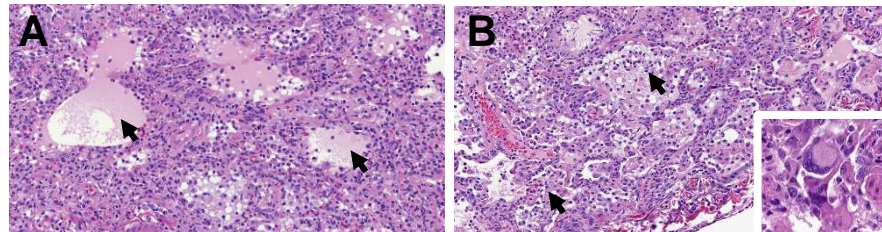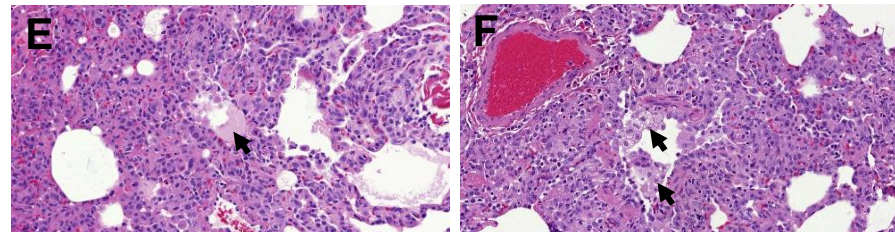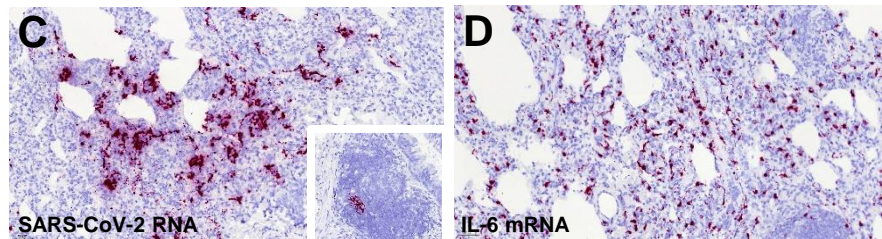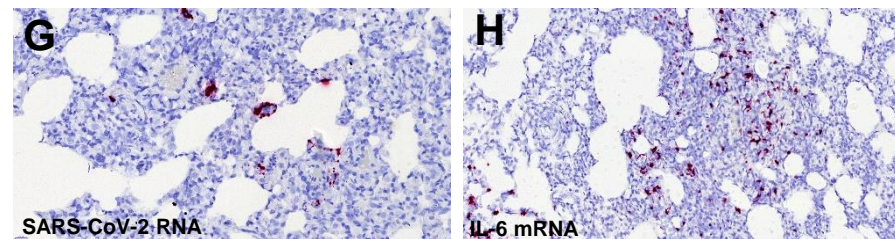

14/15 dpc

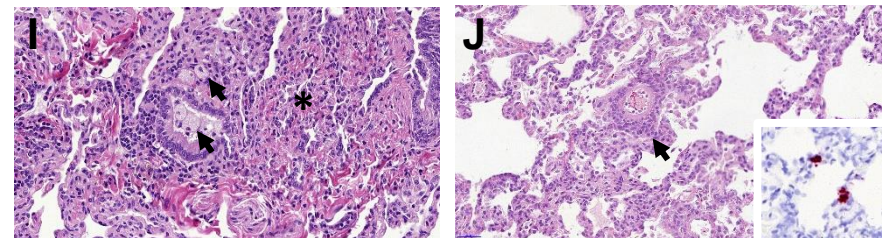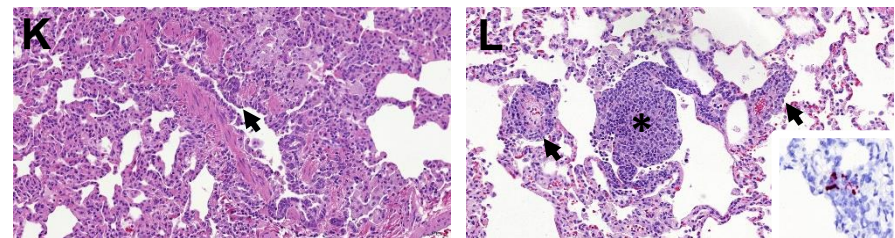



**A**

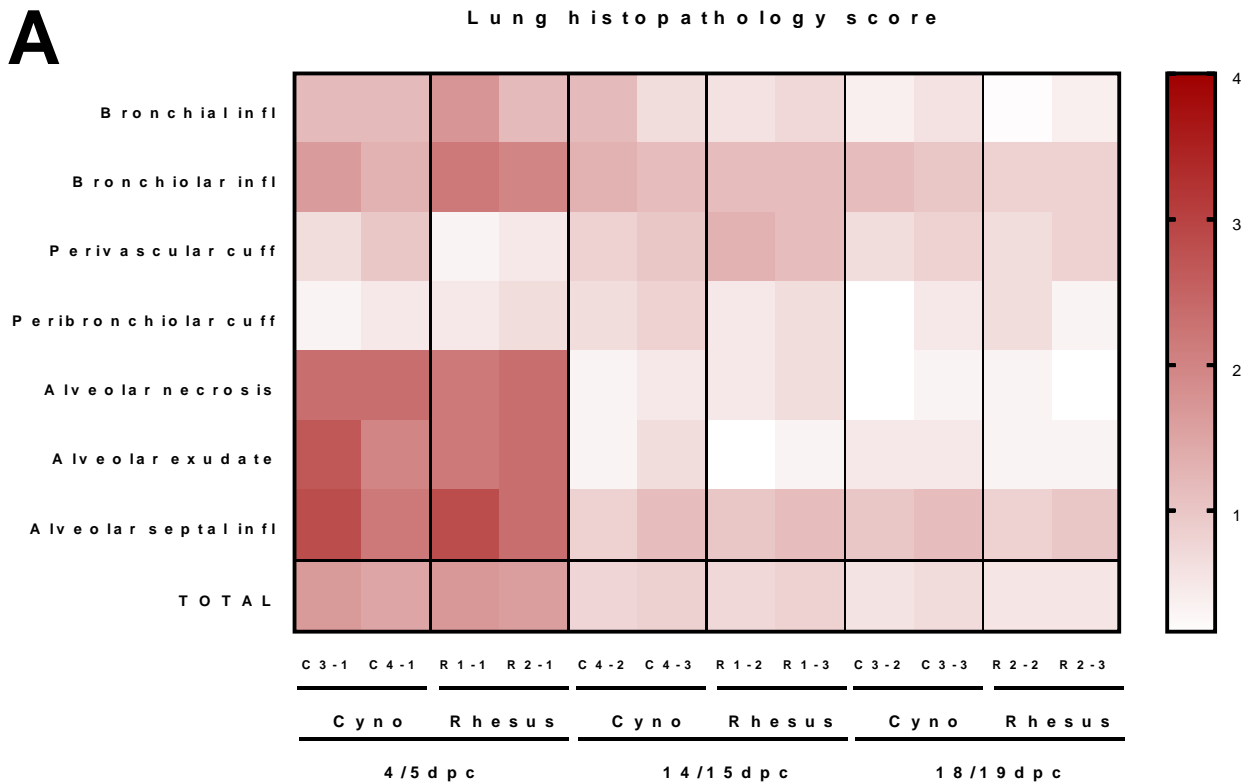

**B**

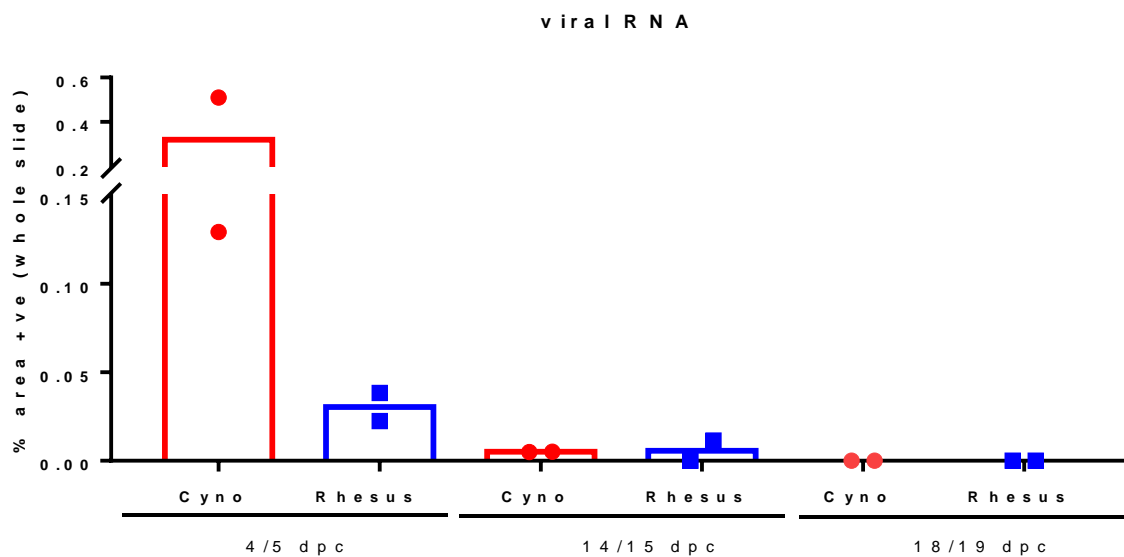

**C**

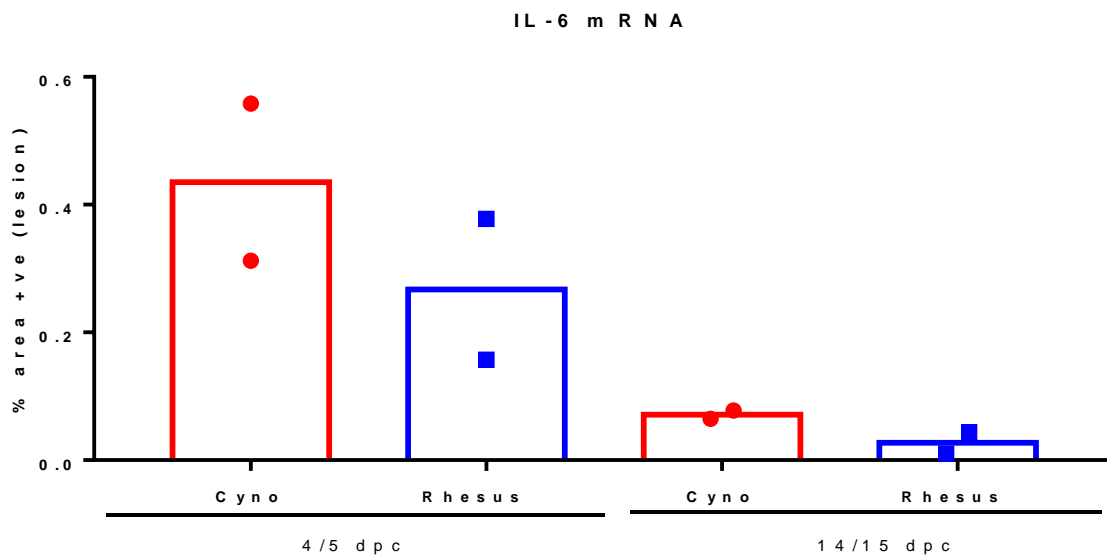

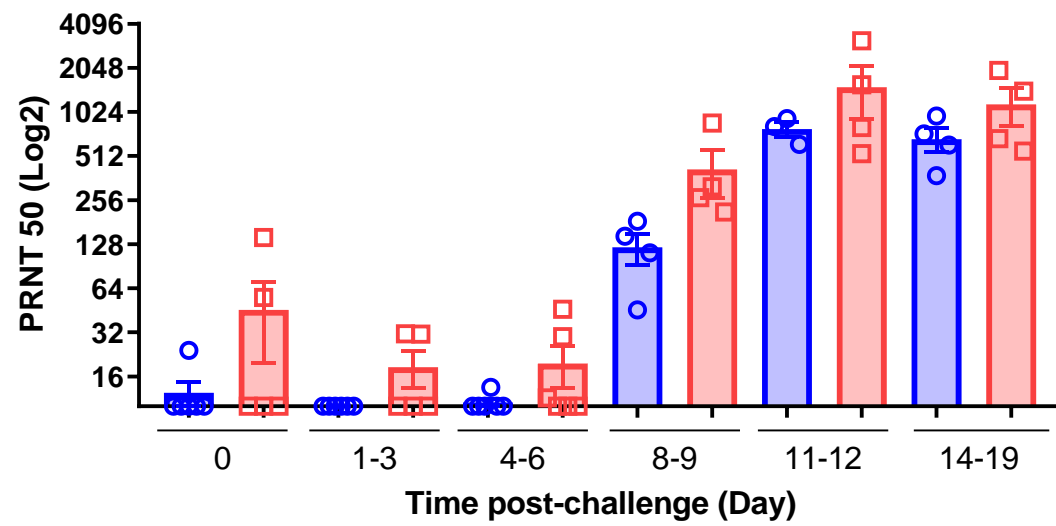

A.

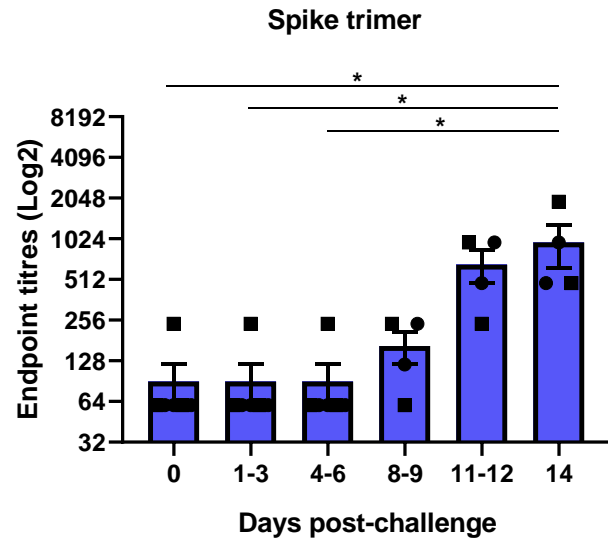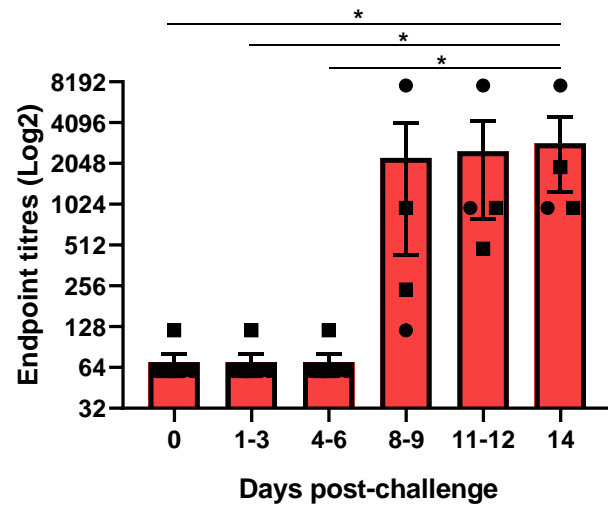

B.

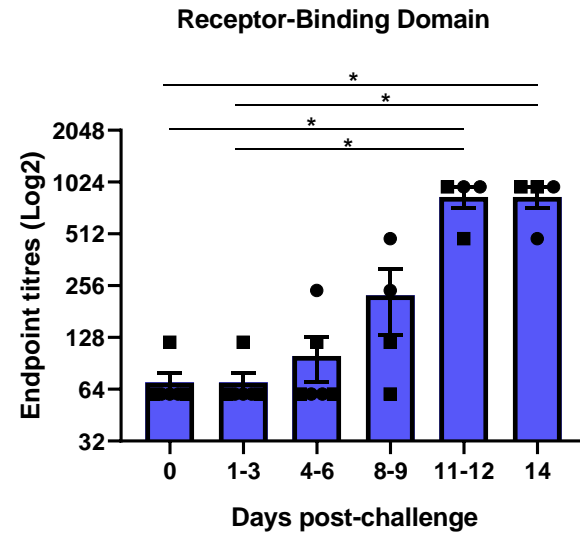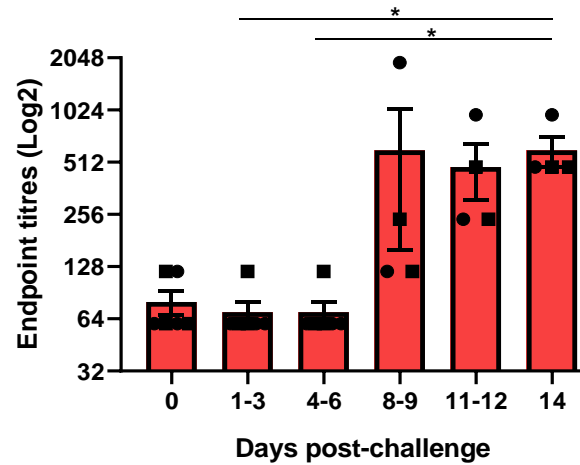

C.

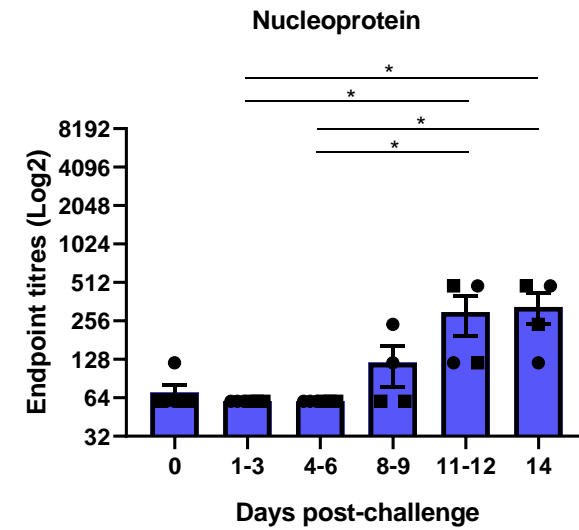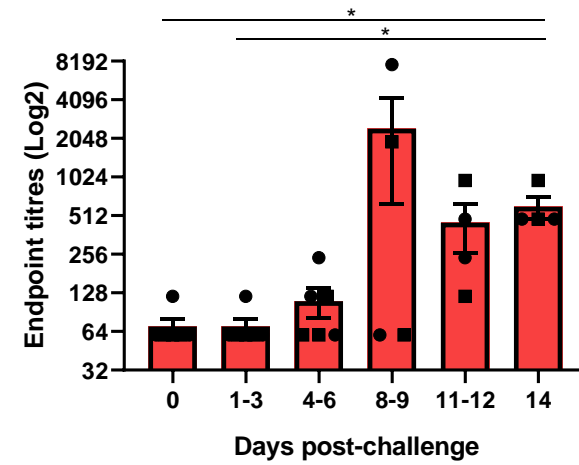

■ Rhesus  
 ■ Cyno  
 ■ Male  
 ● Female

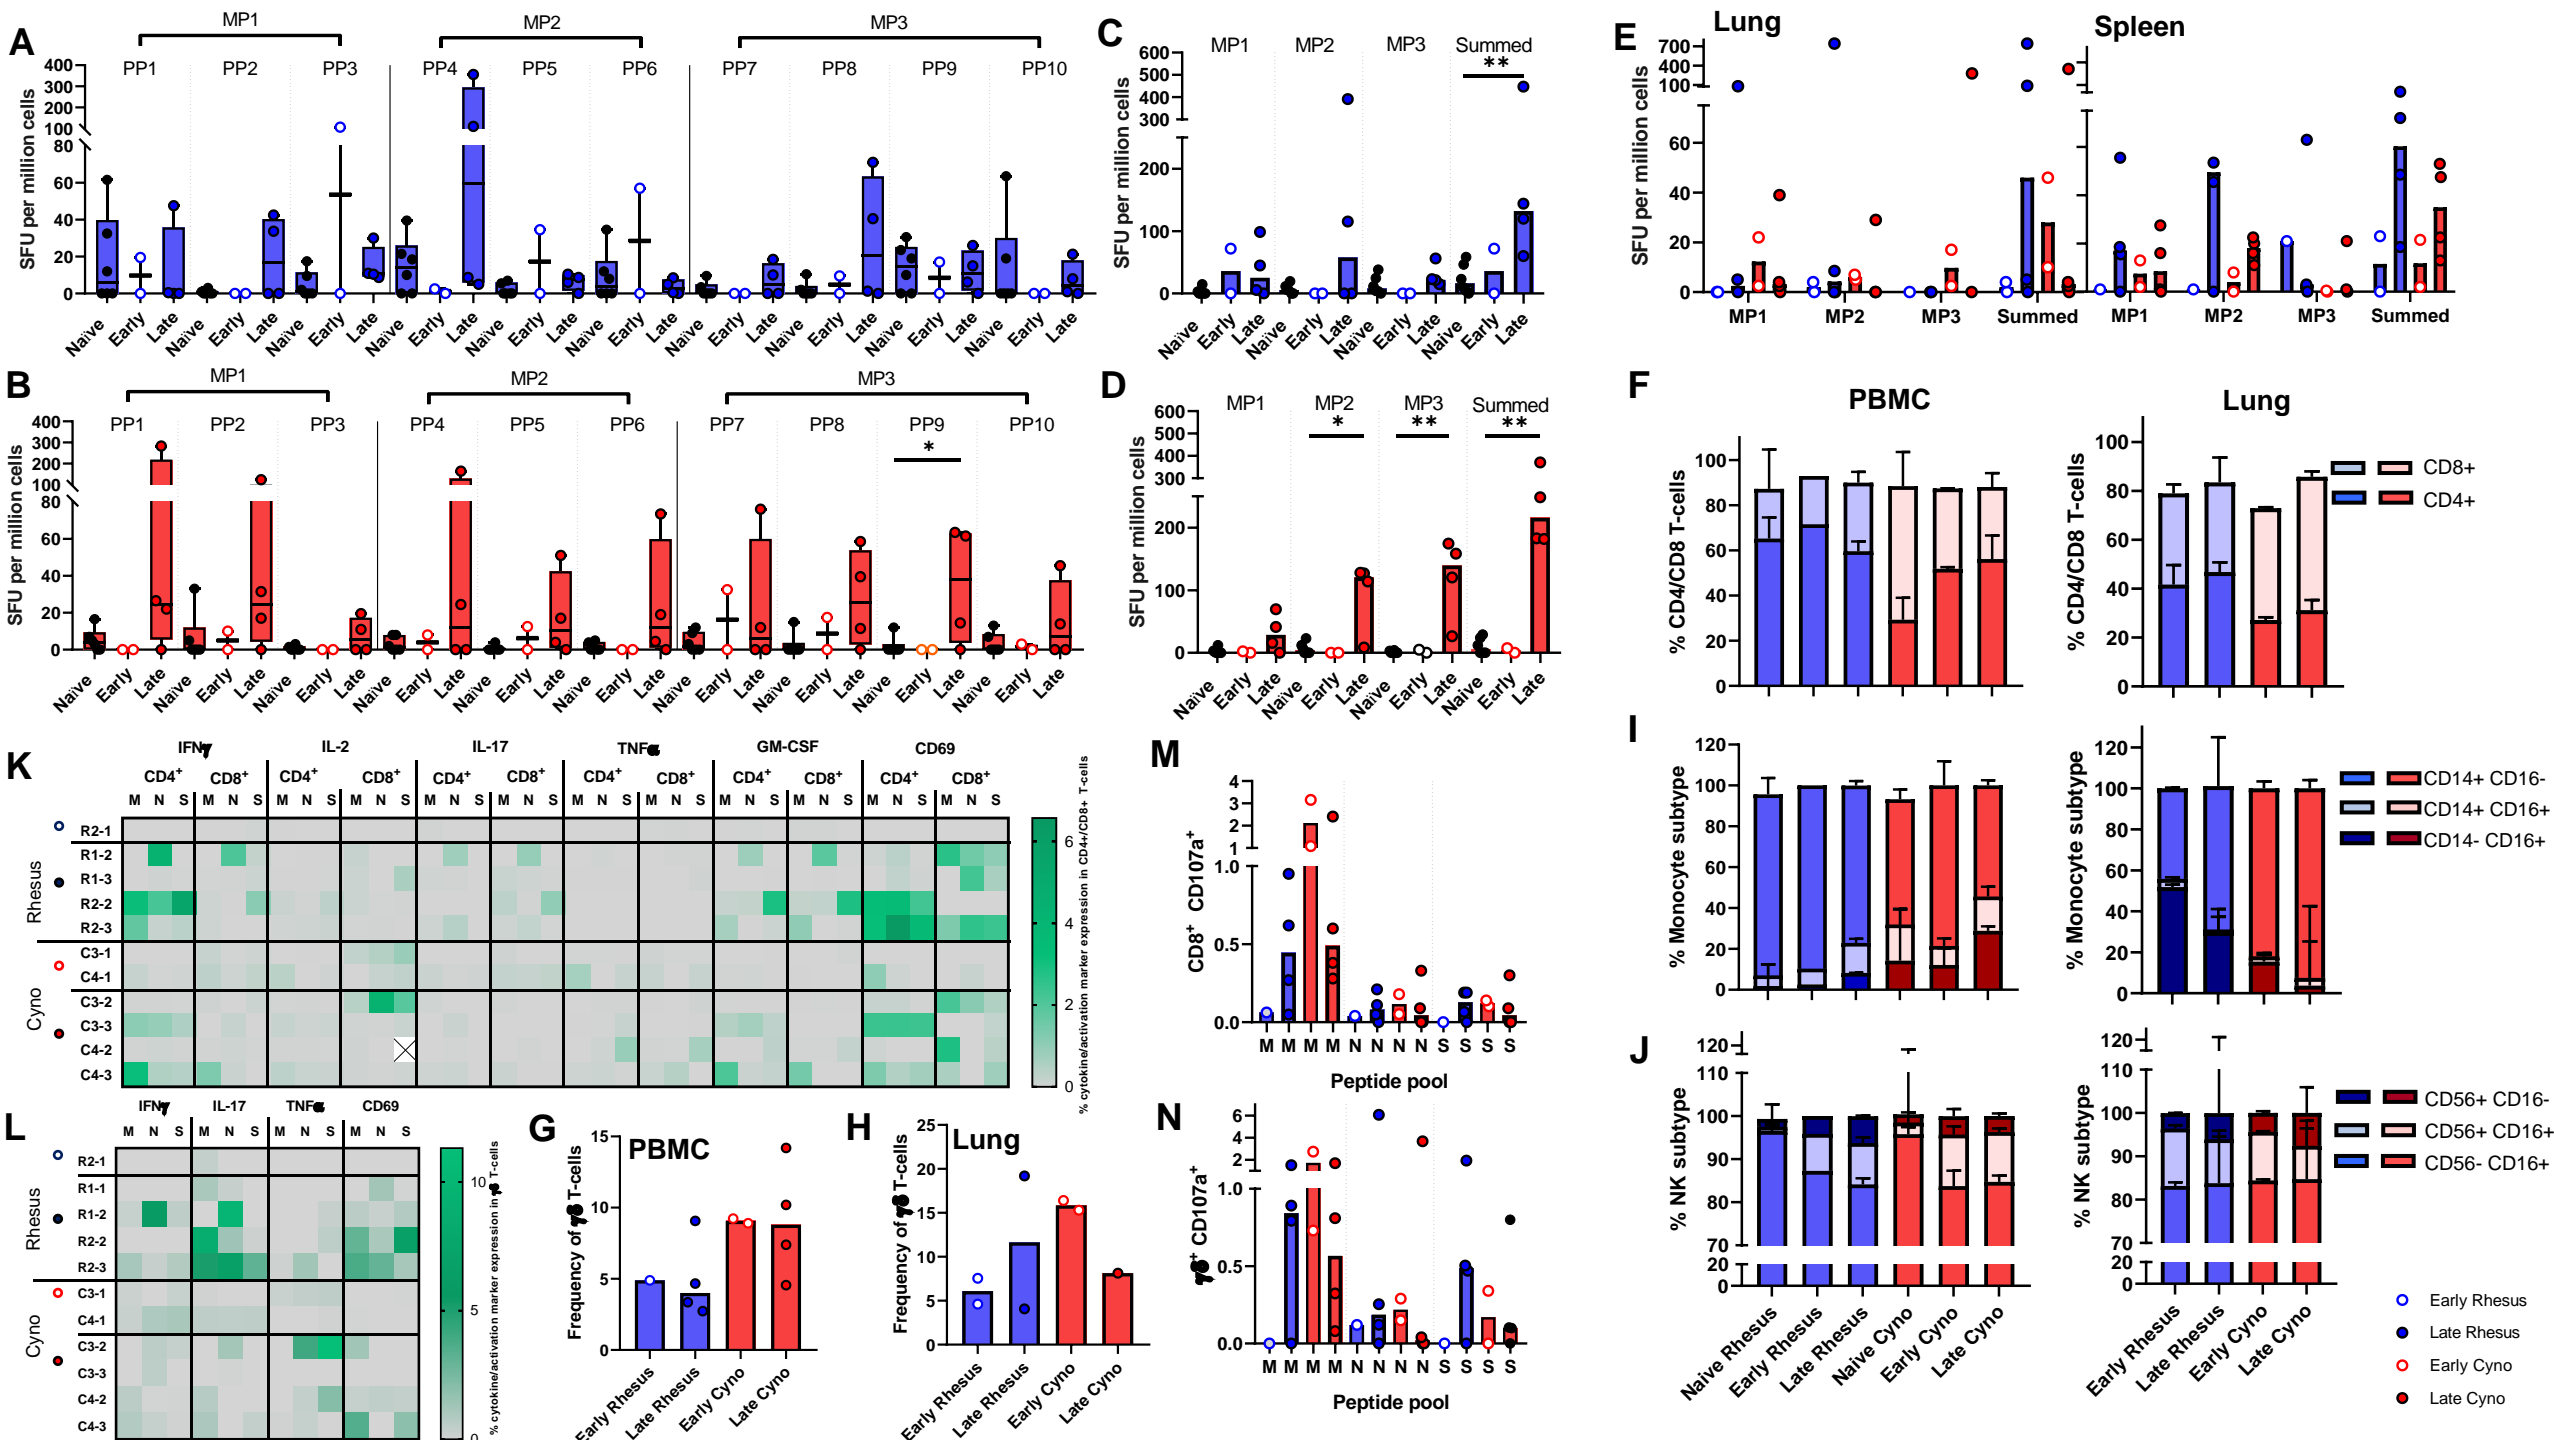

Source: https://www.biorxiv.org/content/biorxiv/early/2020/09/17/2020.09.17.301093.full.pdf
